# Supplementary material for: Cost-effectiveness of sacubitril/valsartan in the treatment of heart failure with reduced ejection fraction
Source: PubMed Central journal article supplement — Heart. 2017 Dec 21;104(12):1006–13. doi: 10.1136/heartjnl-2016-310661 (PMC5992367; doi:10.1136/heartjnl-2016-310661), 2017-12-21
Supplement: heartjnl-2016-310661supp001.pdf [file heartjnl-2016-310661supp001.pdf]

**THE COST-EFFECTIVENESS OF SACUBITRIL/VALSARTAN IN THE TREATMENT OF HEART FAILURE  
AND REDUCED EJECTION FRACTION**

**SUPPLEMENTARY MATERIAL**

**McMurray JJV<sup>1</sup>, Trueman D<sup>2,3</sup>, Hancock E<sup>2,3</sup>, Cowie MR<sup>4</sup>, Briggs A<sup>1</sup>, Taylor M<sup>5</sup>, Mumby-Croft J<sup>2</sup>,  
Woodcock F<sup>2</sup>, Lacey M<sup>6</sup>, Haroun R<sup>7</sup>, Deschaseaux C<sup>7</sup>**

<sup>1</sup>University of Glasgow, Glasgow, United Kingdom; <sup>2</sup>DRG Abacus Ltd, Bicester, United Kingdom; <sup>3</sup>  
PHMR Ltd, London, United Kingdom; <sup>4</sup>Imperial College London, London, United Kingdom; <sup>5</sup>York  
Health Economics Consortium Ltd., York, United Kingdom; <sup>6</sup>Truven Health Analytics, an IBM Watson  
Health Company, USA; <sup>7</sup>Novartis Pharma AG, Basel, Switzerland.

## Contents

|        |                                                                     |    |
|--------|---------------------------------------------------------------------|----|
| 1.     | Details of costs .....                                              | 4  |
| 1.1.   | UK setting .....                                                    | 4  |
| 1.1.1. | Pharmacological therapies .....                                     | 4  |
| 1.1.2. | Hospitalisation .....                                               | 6  |
| 1.1.3. | Background medical resource use .....                               | 8  |
| 1.1.4. | Adverse events.....                                                 | 10 |
| 1.1.5. | Initial costs associated with titrating sacubitril/valsartan .....  | 13 |
| 1.2.   | Danish setting .....                                                | 14 |
| 1.2.1. | Pharmacological therapies.....                                      | 14 |
| 1.2.2. | Hospitalisation .....                                               | 15 |
| 1.2.3. | Background medical resource use .....                               | 16 |
| 1.2.4. | Adverse events.....                                                 | 16 |
| 1.2.5. | Initial costs associated with titrating sacubitril/valsartan .....  | 18 |
| 1.3.   | Colombian setting .....                                             | 18 |
| 1.3.1. | Pharmacological therapies.....                                      | 18 |
| 1.3.2. | Hospitalisation .....                                               | 19 |
| 1.3.3. | Background medical resource use .....                               | 19 |
| 1.3.4. | Adverse events.....                                                 | 20 |
| 1.3.5. | Cost of drug titration.....                                         | 22 |
| 2.     | Statistical model results .....                                     | 23 |
| 3.     | Cost-effectiveness results using all-cause mortality.....           | 32 |
| 4.     | Parameter selection and transformations .....                       | 34 |
| 5.     | Quintile analysis .....                                             | 37 |
| 6.     | Scenario analyses .....                                             | 40 |
| 6.1.   | Sensitivity analyses .....                                          | 40 |
| 6.2.   | UK setting.....                                                     | 40 |
| 6.3.   | Danish setting .....                                                | 42 |
| 6.4.   | Colombian setting .....                                             | 45 |
| 6.5.   | Subgroup analysis .....                                             | 48 |
| 7.     | Re-weighting of the PARADIGM-HF population in the UK setting.....   | 57 |
| 8.     | Inclusion of the PARADIGM-HF run-in phase.....                      | 59 |
| 9.     | Comparison of sacubitril/valsartan with ARBs in the UK setting..... | 61 |

References ..... 62

## **1. Details of costs**

### **1.1. UK setting**

#### **1.1.1. Pharmacological therapies**

In the base-case analysis, the daily cost of ACEi is based on the observed enalapril dose from PARADIGM-HF (18.9 mg per day). The daily cost of sacubitril/valsartan is based on the observed dose of sacubitril/valsartan used in PARADIGM-HF (375 mg).

Typical costs of other background medications (including beta-blockers (BB) and mineralocorticoid receptor antagonists (MRA)) are based on recommended doses. Daily costs for primary and background therapies are presented in Table 1. A summary of cost data is provided in Table 2.

**Table 1: Daily costs of primary and background therapies**

| Therapy               | Daily cost‡ | Daily dose assumptions    | Unit costs source |
|-----------------------|-------------|---------------------------|-------------------|
| Sacubitril/valsartan* | £3.27       | 375 mg†                   | BNF <sup>1</sup>  |
| Enalapril*            | £0.07       | 18.9 mg†                  | BNF <sup>1</sup>  |
| Carvedilol*           | £0.11       | Two 25 mg tabs            | BNF <sup>1</sup>  |
| Bisoprolol            | £0.04       | One 10 mg tab             | BNF <sup>1</sup>  |
| Spirolactone*         | £0.07       | One 50 mg tab             | BNF <sup>1</sup>  |
| Digoxin*              | £0.05       | One 62.5 µg or 125 µg tab | BNF <sup>1</sup>  |
| Atorvastatin*         | £0.05       | One 20 mg tab             | BNF <sup>1</sup>  |
| Simvastatin           | £0.07       | One 80 mg tab             | BNF <sup>1</sup>  |
| Furosemide*           | £0.03       | One 20 mg or 40 mg tab    | BNF <sup>1</sup>  |
| Aspirin*              | £0.03       | One 75 mg tab             | BNF <sup>1</sup>  |
| Warfarin*             | £0.04       | One 5 mg tab              | BNF <sup>1</sup>  |
| Clopidogrel*          | £0.07       | One 75 mg tab             | BNF <sup>1</sup>  |

\*Cost used in the base-case

†Average sacubitril/valsartan dose is 375 mg daily in PARADIGM-HF; average enalapril dose is 18.9 mg daily in PARADIGM-HF<sup>2</sup>.

‡ Using list prices

**Table 2: Summary of cost data**

|                                | Total cost - UK | Total cost - Denmark | Total cost - Colombia |
|--------------------------------|-----------------|----------------------|-----------------------|
| <i>Monthly costs</i>           |                 |                      |                       |
| Sacubitril/valsartan           | £99.61          | kr. 1,109.30         | COP\$268,915.31       |
| ACEI (enalapril)               | £3.17           | kr. 17.19            | COP\$49,549.09        |
| Background therapy             | £7.31           | kr. 76.89            | COP\$57,346.88        |
| Background medical management  | £69.31          | kr. 75.22            | COP\$52,562.03        |
| <i>Cost per event</i>          |                 |                      |                       |
| Hospitalisation                | £2,866          | kr. 47,760           | COP\$6,830,157.00     |
| AE – hypotension               | £70             | kr. 271              | COP\$51,600.00        |
| AE – cough                     | £73             | kr. 281              | COP\$72,693.00        |
| AE – angioedema                | £221            | kr. 1,234            | COP\$72,964.14        |
| AE – elevated serum creatinine | £73             | kr. 281              | COP\$88,338.00        |
| AE – elevated serum potassium  | £73             | kr. 281              | COP\$96,974.00        |

Abbreviations: AE, adverse event; ACEI, angiotensin-converting-enzyme inhibitor

### 1.1.2. Hospitalisation

Costs for hospitalisation are taken from the NHS National Schedule of Reference Costs 2013–2014<sup>3</sup>. NHS reference costs provide unit costs for a hospitalisation event, and not a cost per day; this method is considered to be aligned with the process through which care is reimbursed in England and Wales.

The proportion of each type of hospitalisation is taken from PARADIGM-HF. A scenario is included in which these proportions are derived from patients in Western Europe, in order to better reflect the kinds of surgical and interventional procedures that are performed in the UK. In the UK, hospitalisations are costed according to HRG code – hospitalisations, including a surgery or interventional procedure, are costed separately and include the costs of medical management incurred before and after the procedure. Hospitalisations observed during PARADIGM-HF are therefore costed according to the algorithm presented in Figure 1.

**Figure 1: Algorithm to determine how each hospitalisation is costed**

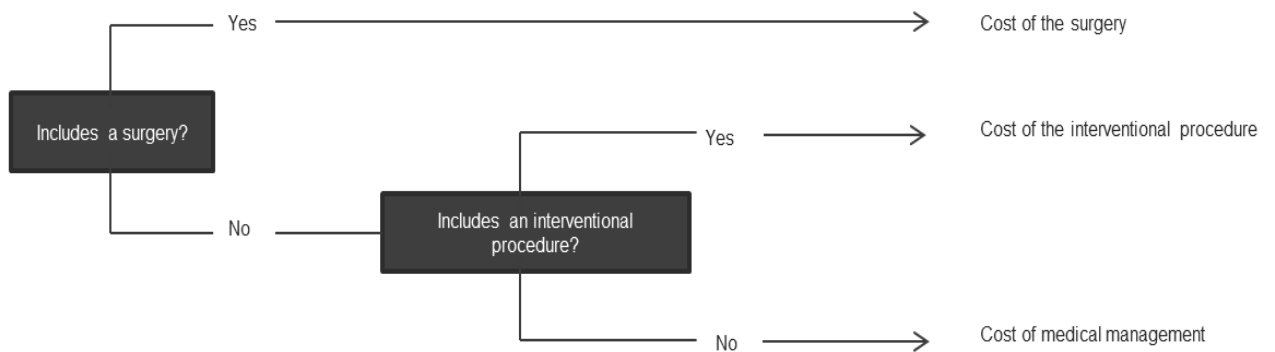

The proportions of each type of hospitalisation are presented in Table 3.

**Table 3: Proportions of hospitalisations that are surgeries, interventional procedures and medical management alone**

| Hospitalisation type      | Proportion of hospitalisations |
|---------------------------|--------------------------------|
| Surgical procedures       | 3%                             |
| Interventional procedures | 7%                             |
| Medical management        | 91%                            |

Each hospitalisation type is costed according to hospitalisations as observed in PARADIGM-HF (Table 4); physician reported diagnoses are mapped to the most appropriate HRG codes, and a weighted average is calculated using NHS activity as reported in the NHS National Schedule of Reference Costs

(2013–2014). For simplicity, hospitalisations for medical management were only included where >30 cases had been recorded.

**Table 4: Cost per hospitalisation (weighted average of relevant HRG codes)**

| Event           | Cost per event | Source                                              |
|-----------------|----------------|-----------------------------------------------------|
| Hospitalisation | £2,866         | NHS National Schedule of Reference Costs, 2013-2014 |

### **1.1.3. Background medical resource use**

Because of the protocol-driven nature of resource use within PARADIGM-HF, estimates of background resource use are taken from relevant national sources. Levels of background resource use are assumed to be the same between both arms of the model (Table 5).

Estimates of background resource use include A&E referrals, outpatient contacts and GP visits. Mean annual use is taken from a study using data from the Clinical Practice Research Datalink (CPRD) <sup>4</sup>; unit costs are taken from published national sources.



**Table 5: Background medical resource use**

|                                    |                              | Mean annual use† | Unit cost | Source of unit cost                                              |
|------------------------------------|------------------------------|------------------|-----------|------------------------------------------------------------------|
| A&E Visits                         | GP emergency visits          | 0.14             | £35.00    | PSSRU 2014 <sup>5</sup>                                          |
|                                    | A&E referrals                | 0.01             | £123.67   | NHS National Schedule of Reference Costs, 2013–2014 <sup>3</sup> |
| Outpatient office physician visits | GP visits                    | 13.54            | £35.00    | PSSRU 2014 <sup>5</sup>                                          |
|                                    | Cardiologist visits          | 0.05             | £130.86   | NHS National Schedule of Reference Costs, 2013–2014 <sup>3</sup> |
|                                    | Other physician visits       | 0.36             | £35.00    | PSSRU 2014 <sup>5</sup>                                          |
| Other GP visits or contacts        | GP home visits               | 1.23             | £35.00    | PSSRU 2014 <sup>5</sup>                                          |
|                                    | GP nursing home visits       | 0.19             | £35.00    | PSSRU 2014 <sup>5</sup>                                          |
|                                    | GP residential home visits   | 0.04             | £35.00    | PSSRU 2014 <sup>5</sup>                                          |
|                                    | GP phone calls to patient    | 0.73             | £35.00    | PSSRU 2014 <sup>5</sup>                                          |
|                                    | GP visits with third parties | 7.27             | £35.00    | PSSRU 2014 <sup>5</sup>                                          |

Abbreviations: A&E, accident and emergency; GP, general practitioner, NHS, National Health Service; PSSRU, Personal Social Services Research Unit.

†Mean annual use based on CPRD data<sup>4</sup>

#### 1.1.4. Adverse events

The AE profile for enalapril and sacubitril/valsartan (as observed in PARADIGM-HF, and reported by McMurray et al <sup>2</sup>) is presented in Table 6.

**Table 6: AE profile for enalapril and sacubitril/valsartan from PARADIGM-HF**

| Event                                                              | Sacubitril/valsartan<br>(N=4187) | Enalapril (N=4212) | p value |
|--------------------------------------------------------------------|----------------------------------|--------------------|---------|
| Hypotension                                                        |                                  |                    |         |
| <i>Symptomatic</i>                                                 | 588 (14.0)                       | 388 (9.2)          | <0.001  |
| <i>Symptomatic with<br/>systolic blood pressure<br/>&lt;90mmHg</i> | 112 (2.7)                        | 59 (1.4)           | <0.001  |
| Elevated serum creatinine                                          |                                  |                    |         |
| <i>≥2.5 mg/dl</i>                                                  | 139 (3.3)                        | 188 (4.5)          | 0.007   |
| <i>≥3 mg/dl</i>                                                    | 63 (1.5)                         | 83 (2.0)           | 0.10    |
| Elevated serum potassium                                           |                                  |                    |         |
| <i>&gt;5.5 mmol/liter</i>                                          | 674 (16.1)                       | 727 (17.3)         | 0.15    |
| <i>&gt;6.0 mmol/liter</i>                                          | 181 (4.3)                        | 236 (5.6)          | 0.007   |
| Cough                                                              | 474 (11.3)                       | 601 (14.3)         | <0.001  |
| Angioedema                                                         |                                  |                    |         |
| <i>No treatment or use of<br/>antihistamines only</i>              | 10 (0.2)                         | 5 (0.1)            | 0.19    |
| <i>Use of catecholamines<br/>or glucocorticoids</i>                | 6 (0.1)                          | 4 (0.1)            | 0.52    |

| Event                                                | Sacubitril/valsartan<br>(N=4187) | Enalapril (N=4212) | p value |
|------------------------------------------------------|----------------------------------|--------------------|---------|
| <i>without hospitalisation</i>                       |                                  |                    |         |
| <i>Hospitalisation without<br/>airway compromise</i> | 3 (0.1)                          | 1 (<0.1)           | 0.31    |
| Airway compromise                                    | 0                                | 0                  |         |

All AEs reported by McMurray et al<sup>2</sup> are considered in this analysis. Estimates of resource use associated with AEs were taken from UK clinical opinion, and are as follows:

- Hypotension: patients experiencing hypotension require 2 additional GP visits
- Cough: patients experiencing cough require 2 additional GP visits and a blood test
- Angioedema:
  - Patients experiencing milder angioedema (“no treatment or use of antihistamines only”) require 2 outpatient visits in addition to the cost of antihistamines
  - Patients experiencing more severe angioedema (“Use of catecholamines or glucocorticoids without hospitalisation”) require an Evisit and a follow-up GP visit in addition to the cost of glucocorticoids
  - Patients hospitalised for angioedema are captured within the hospitalisation model and are not considered here
- Patients with elevated serum creatinine require 2 additional GP visits and a blood test
- Patients with elevated serum potassium require 2 additional GP visits and a blood test
- Unit costs associated with AEs are presented in Table 7.

**Table 7: Unit costs associated with AEs**

| Resource use                                                                           | Cost    | Source                                                           |
|----------------------------------------------------------------------------------------|---------|------------------------------------------------------------------|
| GP visit (patient contact lasting 11.7 minutes)                                        | £35.00  | PSSRU <sup>6</sup>                                               |
| Lab test (haematology)                                                                 | £3.00   | NHS National Schedule of Reference Costs, 2013–2014 <sup>3</sup> |
| Outpatient contact                                                                     | £130.86 | PSSRU <sup>6</sup>                                               |
| Daily cost of antihistamines (cetirizine once daily, 10 mg, assumed taken for 14 days) | £0.04   | BNF <sup>1</sup>                                                 |
| ER visit                                                                               | £123.67 | NHS National Schedule of Reference Costs, 2013–2014 <sup>3</sup> |
| Daily cost of glucocorticoids (prednisolone, 40 mg, assumed taken for 5 days)          | £0.37   | BNF <sup>1</sup>                                                 |

The cost applied for each AE is presented in Table 8.

**Table 8: Cost per AE**

| Type of AE                | Cost per event |
|---------------------------|----------------|
| Hypotension               | £70            |
| Cough                     | £73            |
| Angioedema                | £222           |
| Elevated serum creatinine | £73            |
| Elevated serum potassium  | £73            |

Abbreviations: AE, adverse event.

### 1.1.5. Initial costs associated with titrating sacubitril/valsartan

One-off costs for titration have been included for sacubitril/valsartan patients. It is assumed that sacubitril/valsartan titration would require two additional outpatient visits. The initial costs associated with titration are £261.72 (see Table 9). No additional monitoring costs are considered.

**Table 9: Unit costs associated with titration**

| Resource use                  | Cost    | Source                                                              |
|-------------------------------|---------|---------------------------------------------------------------------|
| Cardiology outpatient contact | £130.86 | NHS National Schedule of Reference<br>Costs, 2013-2014 <sup>3</sup> |

## **1.2. Danish setting**

### **1.2.1. Pharmacological therapies**

In the base-case analysis, the daily cost of ACEi is based on the observed enalapril dose from PARADIGM-HF (18.9 mg per day). The daily cost of sacubitril/valsartan is based on the observed dose of sacubitril/valsartan used in PARADIGM-HF (375 mg).

Typical costs of other background medications (including BB and MRA) are based on recommended doses. Daily costs for primary and background therapies are presented in Table 10.

**Table 10: Daily costs of primary and background therapies**

| Therapy               | Daily cost‡ | Daily dose assumptions       | Unit costs source                |
|-----------------------|-------------|------------------------------|----------------------------------|
| Sacubitril/valsartan* | kr. 36.45   | 375 mg†                      | Assumption                       |
| Enalapril*            | kr. 0.56    | 18.9 mg†                     | Lægemiddelstyrelsen <sup>7</sup> |
| Carvedilol*           | kr. 0.77    | Two 25 mg tabs               | Lægemiddelstyrelsen <sup>7</sup> |
| Bisoprolol            | kr. 0.43    | One 10 mg tab                | Lægemiddelstyrelsen <sup>7</sup> |
| Spirolactone*         | kr. 0.79    | One 50 mg tab                | Lægemiddelstyrelsen <sup>7</sup> |
| Digoxin*              | kr. 0.59    | One 62.5 µg or 125 µg<br>tab | Lægemiddelstyrelsen <sup>7</sup> |
| Atorvastatin*         | kr. 0.31    | One 20 mg tab                | Lægemiddelstyrelsen <sup>7</sup> |
| Simvastatin           | kr. 0.42    | One 80 mg tab                | Lægemiddelstyrelsen <sup>7</sup> |
| Furosemide*           | kr. 0.31    | One 20 mg or 40 mg<br>tab    | Lægemiddelstyrelsen <sup>7</sup> |
| Aspirin*              | kr. 0.38    | One 75 mg tab                | Lægemiddelstyrelsen <sup>7</sup> |
| Warfarin*             | kr. 1.56    | One 5 mg tab                 | Lægemiddelstyrelsen <sup>7</sup> |
| Clopidogrel*          | kr. 0.55    | One 75 mg tab                | Lægemiddelstyrelsen <sup>7</sup> |

\* Cost used in the base-case

†Average sacubitril/valsartan dose is 375 mg daily in PARADIGM-HF; average enalapril dose is 18.9 mg daily in PARADIGM-HF <sup>2</sup>.

‡ Using list prices excluding VAT as per Danish HTA guidelines

### 1.2.2. Hospitalisation

Hospitalisation costs calculated in a similar manner to the UK, but costs were weighted average of Danish DRG tariffs (weights based on Western European hospitalization type frequency in

PARADIGM-HF). For those categories where there were several DRG tariffs (e.g. “other cardiac surgery”) we used most recent (available) activity as weights (Table 11).

**Table 11: Cost per hospitalisation (weighted average of relevant HRG codes)**

| Event           | Cost per event | Source                        |
|-----------------|----------------|-------------------------------|
| Hospitalisation | kr. 47,099     | DRG-takster 2015 <sup>8</sup> |

### **1.2.3. Background medical resource use**

In Denmark it was assumed that a patient would incur one outpatient visit and one GP visit per year. The cost of a GP visit was based on the tariff given in the agreement between the Danish Regions and the Danish Medical Association while and the cost of an outpatient consultation was taken from DAGS tariff BG50A.<sup>8</sup> The monthly cost of background medical resource use was estimated to be kr. 75.

### **1.2.4. Adverse events**

Assumptions on the rates of adverse events and their associated resource use are the same as for the UK. Unit costs associated with AEs are presented in Table 12 and Table 7.



**Table 7Table 12: Unit costs associated with AEs - Denmark**

| Resource use                                                                           | Cost       | Source                                                                                       |
|----------------------------------------------------------------------------------------|------------|----------------------------------------------------------------------------------------------|
| GP visit (patient contact lasting 11.7 minutes)                                        | kr. 135.64 | Basic daytime GP consultation<br><br><a href="http://www.laeger.dk">http://www.laeger.dk</a> |
| Lab test (haematology)                                                                 | kr. 10.00  | Assumption                                                                                   |
| Outpatient contact                                                                     | kr. 767.00 | DAGS tariff BG50A <sup>8</sup>                                                               |
| Daily cost of antihistamines (cetirizine once daily, 10 mg, assumed taken for 14 days) | kr. 2.80   | Lægemiddelstyrelsen <sup>7</sup>                                                             |
| ER visit                                                                               | kr. 551.00 | DAGS tariff AA01C <sup>8</sup>                                                               |
| Daily cost of glucocorticoids (prednisolone, 40 mg, assumed taken for 5 days)          | kr. 7.80   | Lægemiddelstyrelsen <sup>7</sup>                                                             |

The cost applied for each AE is presented in Table 13 and Table 8.

**Table 13: Cost per AE - Denmark**

| Type of AE                | Cost per event |
|---------------------------|----------------|
| Hypotension               | kr. 271.28     |
| Cough                     | kr. 281.28     |
| Angioedema                | kr. 1,234.18   |
| Elevated serum creatinine | kr. 281.28     |
| Elevated serum potassium  | kr. 281.28     |

Abbreviations: AE, adverse event.

### 1.2.5. Initial costs associated with titrating sacubitril/valsartan

Titration was included in the base case analysis for Denmark. Titration was assumed to require two additional outpatient visits, costed using DAGS tariff BG50A. <sup>8</sup> The cost of titration used in the model is kr. 1,534.

### 1.3. Colombian setting

#### 1.3.1. Pharmacological therapies

| Therapy               | Daily cost†   | Daily dose assumptions    | Unit costs source                     |
|-----------------------|---------------|---------------------------|---------------------------------------|
| Sacubitril/valsartan* | COP\$8,835.00 | 400 mg†                   | Assumption                            |
| Enalapril*            | COP\$1,627.90 | 20 mg†                    | SISMED, 2016. Accessed February 2017. |
| Carvedilol*           | COP\$4,184.30 | Two 25 mg tabs            | SISMED, 2016. Accessed February 2017. |
| Bisoprolol            | COP\$2,834.44 | One 10 mg tab             | SISMED, 2016. Accessed February 2017. |
| Spironolactone*       | COP\$102.18   | Two 25 mg tab             | SISMED, 2016. Accessed February 2017. |
| Digoxin*              |               | One 62.5 µg or 125 µg tab | SISMED, 2016. Accessed February 2017. |
| Atorvastatin*         | COP\$84.18    | One 20 mg tab             | SISMED, 2016. Accessed February 2017. |
| Simvastatin           | COP\$3,600.03 | One 80 mg tab             | SISMED, 2016. Accessed February 2017. |

| Therapy      | Daily cost‡   | Daily dose assumptions    | Unit costs source                        |
|--------------|---------------|---------------------------|------------------------------------------|
| Furosemide*  | COP\$1,220.09 | One 20 mg or 40 mg<br>tab | SISMED, 2016. Accessed<br>February 2017. |
| Aspirin*     | COP\$539.83   | One 75 mg tab             | SISMED, 2016. Accessed<br>February 2017. |
| Warfarin*    | COP\$1,068.19 | One 5 mg tab              | SISMED, 2016. Accessed<br>February 2017. |
| Clopidogrel* | COP\$348.02   | One 75 mg tab             | SISMED, 2016. Accessed<br>February 2017. |

### 1.3.2. Hospitalisation

The cost of a hospitalisation was taken to be COP\$6,830,157, taken from a previous economic evaluation for an exercise based cardiac rehabilitation program in Colombia. {Rincon, 2016 #512} The cost has been exchanged from USD to COP and adjusted to 2015 prices using the World Bank GDP deflator.

### 1.3.3. Background medical resource use

Background medical resource use was assumed to be the same as in the UK, with costs taken from a burden of disease study performed by Deloitte and from SISMED (data on file).

| Resource                           | Average monthly use          | Mean annual use | Unit cost    |
|------------------------------------|------------------------------|-----------------|--------------|
| A&E Visits                         | GP emergency visits          | 0.14            | \$ 77,300.00 |
|                                    | A&E referrals                | 0.01            | \$ 37,200.00 |
| Outpatient office physician visits | GP visits                    | 13.54           | \$ 25,800.00 |
|                                    | Cardiologist visits          | 0.05            | \$ 37,200.00 |
|                                    | Other physician visits       | 0.36            | \$ 25,800.00 |
| Other GP visits or contacts        | GP home visits               | 1.23            | \$ 37,158.00 |
|                                    | GP hospital visits           | 0.19            | \$ 25,800.00 |
|                                    | GP nursing home visits       | 0.04            | \$ 25,800.00 |
|                                    | GP residential home visits   | 0.04            | \$ 25,800.00 |
|                                    | GP phone calls to patient    | 0.73            | \$ 25,800.00 |
|                                    | GP visits with third parties | 7.27            | \$ 25,800.00 |

#### 1.3.4. Adverse events

The same resource use assumptions have been applied to cost adverse events in Colombia as were applied in the UK. Costs have been taken from a burden of disease report performed by Deloitte.

| Resource use                                                                          | Cost        | Source                                                                                                                 |
|---------------------------------------------------------------------------------------|-------------|------------------------------------------------------------------------------------------------------------------------|
| GP visit                                                                              | COP\$25,800 | Data on file - Deloitte Health Economics. The economic burden of heart conditions-Colombia, 2016. Table B.8, pg 87-89. |
| Lab test (haematology)                                                                | COP\$21,093 | SISMED. Valorización Insuficiencia Cardiaca Crónica. Abril de 2016                                                     |
| Outpatient contact                                                                    | COP\$25,800 | Data on file - Deloitte Health Economics. The economic burden of heart conditions-Colombia, 2016. Table B.8, pg 87-89. |
| Daily cost of antihistamines (cetirizine once daily, 10mg, assumed taken for 14 days) | COP\$71.70  | SISMED, 2016. Accessed February 2017.                                                                                  |
| ER visit                                                                              | COP\$77,300 | Data on file - Deloitte Health Economics. The economic burden of heart conditions-Colombia, 2016. Table B.8, pg 87-89. |
| Daily cost of glucocorticoids (prednisolone, 40mg, assumed taken for 5 days)          | COP\$80.93  | SISMED, 2016. Accessed February 2017.                                                                                  |

| Type of AE  | Cost per event |
|-------------|----------------|
| Hypotension | COP\$51,600.00 |

|                           |                |
|---------------------------|----------------|
| Cough                     | COP\$72,693.00 |
| Angioedema                | COP\$72,964.14 |
| Elevated serum creatinine | COP\$88,338.00 |
| Elevated serum potassium  | COP\$96,974.00 |

### **1.3.5. Cost of drug titration**

Titration of sacubitril/valsartan was assumed to incur two additional GP visits, costing COP\$25,800 each, making the total cost of titration COP\$51,600.

## 2. Statistical model results

**Table 14: Results of the Gompertz model of CV mortality**

| <b>Coefficient</b>                                | <b>UK &amp; Colombian analysis<br/>(coefficient, 95% LCI, 95% UCI)</b> | <b>Danish analysis (coefficient, 95%<br/>LCI, 95% UCI)</b> |
|---------------------------------------------------|------------------------------------------------------------------------|------------------------------------------------------------|
| Sacubitril valsartan                              | -0.216 (-0.328, -0.104)                                                | -0.215 (-0.327, -0.103)                                    |
| Age <sup>†</sup>                                  | -0.092 (-0.128, -0.057)                                                | -0.092 (-0.127, -0.057)                                    |
| Age <sup>^2</sup>                                 | 0.001 (0.000, 0.001)                                                   | 0.001 (0.000, 0.001)                                       |
| Female                                            | -0.357 (-0.508, -0.207)                                                | -0.354 (-0.504, -0.204)                                    |
| Region - Latin America<br>(vs. North America)     | 0.625 (0.340, 0.910)                                                   | 0.628 (0.342, 0.913)                                       |
| Region - Western<br>Europe (vs. North<br>America) | 0.168 (-0.089, 0.424)                                                  | 0.170 (-0.086, 0.426)                                      |
| Region - Central Europe<br>(vs. North America)    | 0.529 (0.270, 0.787)                                                   | 0.527 (0.269, 0.786)                                       |
| Region - Asia-Pacific (vs.<br>North America)      | -0.187 (-0.809, 0.435)                                                 | -0.181 (-0.803, 0.440)                                     |
| Race - Black (vs.<br>Caucasian)                   | 0.409 (0.126, 0.691)                                                   | 0.409 (0.127, 0.692)                                       |
| Race - Asian (vs.<br>Caucasian)                   | 0.962 (0.377, 1.548)                                                   | 0.959 (0.373, 1.545)                                       |

| <b>Coefficient</b>                         | <b>UK &amp; Colombian analysis<br/>(coefficient, 95% LCI, 95% UCI)</b> | <b>Danish analysis (coefficient, 95%<br/>LCI, 95% UCI)</b> |
|--------------------------------------------|------------------------------------------------------------------------|------------------------------------------------------------|
| Race - Other (vs. Caucasian)               | 0.168 (-0.072, 0.409)                                                  | 0.169 (-0.071, 0.410)                                      |
| NYHA class III/IV (vs. I/II)               | 0.296 (0.165, 0.427)                                                   | 0.300 (0.169, 0.431)                                       |
| LVEF <sup>†</sup>                          | -0.017 (-0.026, -0.008)                                                | -0.017 (-0.026, -0.008)                                    |
| log(eGFR) <sup>†</sup>                     | -0.238 (-0.444, -0.031)                                                | -0.238 (-0.445, -0.032)                                    |
| log(NT-proBNP) <sup>†</sup>                | 0.443 (0.385, 0.502)                                                   | 0.443 (0.385, 0.502)                                       |
| Sodium <sup>†</sup>                        | -0.027 (-0.046, -0.007)                                                | -0.027 (-0.046, -0.007)                                    |
| QRS duration <sup>†</sup>                  | 0.002 (0.001, 0.003)                                                   | 0.002 (0.001, 0.003)                                       |
| Diabetes                                   | 0.229 (0.111, 0.346)                                                   | 0.230 (0.112, 0.347)                                       |
| Beta blocker use                           | -0.320 (-0.509, -0.131)                                                | -0.321 (-0.510, -0.132)                                    |
| 1-5 years since HF diagnosis (vs. ≤1 year) | 0.210 (0.063, 0.356)                                                   | 0.212 (0.065, 0.358)                                       |
| >5 years since HF diagnosis (vs. ≤1 year)  | 0.344 (0.186, 0.502)                                                   | 0.346 (0.188, 0.503)                                       |
| Ischaemic aetiology                        | 0.156 (0.033, 0.278)                                                   | 0.157 (0.035, 0.280)                                       |
| Previously hospitalised for HF             | 0.159 (0.038, 0.280)                                                   | 0.159 (0.038, 0.280)                                       |
| EQ-5D <sup>†</sup>                         | -0.563 (-0.813, -0.313)                                                | -0.659 (-0.980, -0.338)                                    |



| <b>Coefficient</b> | <b>UK &amp; Colombian analysis<br/>(coefficient, 95% LCI, 95% UCI)</b> | <b>Danish analysis (coefficient, 95%<br/>LCI, 95% UCI)</b> |
|--------------------|------------------------------------------------------------------------|------------------------------------------------------------|
| Constant           | -12.665 (-13.934, -11.395)                                             | -12.663 (-13.933, -11.393)                                 |
| Gamma              | 0.000 (0.000, 0.000)                                                   | 0.000 (0.000, 0.000)                                       |

Abbreviations: NYHA, New York Heart Association; LVEF, left ventricle ejection fraction; eGFR, estimated glomerular filtration rate; NT-proBNP, N-terminal pro b-type natriuretic peptide; HF, Heart failure.

†Variable has been centred on the mean

**Table 15: Results of the gompertz model of all-cause mortality**

| <b>Coefficient</b>                          | <b>UK &amp; Colombian analysis<br/>(coefficient, 95% LCI, 95% UCI)</b> | <b>Danish analysis (coefficient,<br/>95% LCI, 95% UCI)</b> |
|---------------------------------------------|------------------------------------------------------------------------|------------------------------------------------------------|
| Sacubitril valsartan                        | -0.161 (-0.261, -0.061)                                                | -0.160 (-0.260, -0.060)                                    |
| Age <sup>†</sup>                            | -0.102 (-0.134, -0.070)                                                | -0.101 (-0.133, -0.069)                                    |
| Age <sup>2</sup>                            | 0.001 (0.001, 0.001)                                                   | 0.001 (0.001, 0.001)                                       |
| Female                                      | -0.384 (-0.520, -0.247)                                                | -0.386 (-0.522, -0.249)                                    |
| Region - Latin America (vs. North America)  | 0.542 (0.294, 0.790)                                                   | 0.529 (0.280, 0.779)                                       |
| Region - Western Europe (vs. North America) | 0.130 (-0.088, 0.349)                                                  | 0.130 (-0.089, 0.349)                                      |
| Region - Central Europe (vs. North America) | 0.364 (0.140, 0.588)                                                   | 0.347 (0.122, 0.572)                                       |
| Region - Asia-Pacific (vs. North America)   | -0.199 (-0.784, 0.386)                                                 | -0.206 (-0.791, 0.378)                                     |

| <b>Coefficient</b>                         | <b>UK &amp; Colombian analysis<br/>(coefficient, 95% LCI, 95% UCI)</b> | <b>Danish analysis (coefficient,<br/>95% LCI, 95% UCI)</b> |
|--------------------------------------------|------------------------------------------------------------------------|------------------------------------------------------------|
| America)                                   |                                                                        |                                                            |
| Race - Black (vs. Caucasian)               | 0.295 (0.040, 0.550)                                                   | 0.286 (0.030, 0.541)                                       |
| Race - Asian (vs. Caucasian)               | 0.715 (0.160, 1.271)                                                   | 0.707 (0.151, 1.262)                                       |
| Race - Other (vs. Caucasian)               | 0.087 (-0.129, 0.302)                                                  | 0.083 (-0.132, 0.299)                                      |
| NYHA class III/IV (vs. I/II)               | 0.214 (0.095, 0.334)                                                   | 0.206 (0.086, 0.326)                                       |
| LVEF <sup>†</sup>                          | -0.014 (-0.022, -0.005)                                                | -0.014 (-0.022, -0.006)                                    |
| Heart rate <sup>†</sup>                    | 0.006 (0.001, 0.010)                                                   | 0.005 (0.001, 0.010)                                       |
| log(eGFR) <sup>†</sup>                     | -0.228 (-0.415, -0.041)                                                | -0.236 (-0.423, -0.049)                                    |
| log(NT-proBNP) <sup>†</sup>                | 0.391 (0.337, 0.444)                                                   | 0.387 (0.333, 0.440)                                       |
| Sodium <sup>†</sup>                        | -0.031 (-0.049, -0.014)                                                | -0.031 (-0.048, -0.013)                                    |
| QRS duration <sup>†</sup>                  | 0.002 (0.001, 0.003)                                                   | 0.002 (0.001, 0.003)                                       |
| Diabetes                                   | 0.207 (0.101, 0.313)                                                   | 0.216 (0.109, 0.322)                                       |
| Beta blocker use                           | -0.289 (-0.461, -0.116)                                                | -0.288 (-0.461, -0.115)                                    |
| Lipid lowering medication use              | -                                                                      | -0.086 (-0.197, 0.025)                                     |
| 1-5 years since HF diagnosis (vs. ≤1 year) | 0.204 (0.072, 0.336)                                                   | 0.207 (0.075, 0.339)                                       |
| >5 years since HF diagnosis (vs. ≤1 year)  | 0.291 (0.149, 0.434)                                                   | 0.292 (0.150, 0.434)                                       |

| <b>Coefficient</b>             | <b>UK &amp; Colombian analysis<br/>(coefficient, 95% LCI, 95% UCI)</b> | <b>Danish analysis (coefficient,<br/>95% LCI, 95% UCI)</b> |
|--------------------------------|------------------------------------------------------------------------|------------------------------------------------------------|
| ≤1 year)                       |                                                                        |                                                            |
| Ischaemic aetiology            | 0.158 (0.047, 0.269)                                                   | 0.187 (0.071, 0.303)                                       |
| Prior stroke                   | 0.168 (0.005, 0.330)                                                   | 0.173 (0.011, 0.335)                                       |
| Previously hospitalised for HF | 0.153 (0.044, 0.261)                                                   | 0.153 (0.044, 0.261)                                       |
| EQ-5D <sup>†</sup>             | -0.532 (-0.758, -0.306)                                                | -0.632 (-0.923, -0.342)                                    |
| Constant                       | -12.840 (-13.976, -11.705)                                             | -12.761 (-13.903, -11.618)                                 |
| Gamma                          | 0.000 (0.000, 0.001)                                                   | 0.000 (0.000, 0.001)                                       |

Abbreviations: NYHA, New York Heart Association; LVEF, Left ventricle ejection fraction; eGFR, estimated glomerular filtration rate; NT-proBNP, N-terminal pro b-type natriuretic peptide; HF, Heart failure.

<sup>†</sup>Variable has been centred on the mean

**Table 16: Results of negative binomial model for all-cause hospitalisation**

| <b>Coefficient</b>                 | <b>UK &amp; Colombian analysis<br/>(coefficient, 95% LCI, 95% UCI)</b> | <b>Danish analysis (coefficient,<br/>95% LCI, 95% UCI)</b> |
|------------------------------------|------------------------------------------------------------------------|------------------------------------------------------------|
| Sacubitril valsartan               | -0.173 (-0.247, -0.098)                                                | -0.173 (-0.247, -0.098)                                    |
| Age <sup>†</sup>                   | -0.054 (-0.081, -0.028)                                                | -0.054 (-0.080, -0.028)                                    |
| Age <sup>2</sup>                   | 0.000 (0.000, 0.001)                                                   | 0.000 (0.000, 0.001)                                       |
| Female                             | -0.297 (-0.393, -0.200)                                                | -0.300 (-0.397, -0.204)                                    |
| Region - Latin America (vs. North) | -0.362 (-0.528, -0.197)                                                | -0.361 (-0.526, -0.195)                                    |

| <b>Coefficient</b>                          | <b>UK &amp; Colombian analysis<br/>(coefficient, 95% LCI, 95% UCI)</b> | <b>Danish analysis (coefficient,<br/>95% LCI, 95% UCI)</b> |
|---------------------------------------------|------------------------------------------------------------------------|------------------------------------------------------------|
| America)                                    |                                                                        |                                                            |
| Region - Western Europe (vs. North America) | 0.017 (-0.128, 0.162)                                                  | 0.019 (-0.126, 0.164)                                      |
| Region - Central Europe (vs. North America) | -0.322 (-0.470, -0.174)                                                | -0.324 (-0.472, -0.177)                                    |
| Region - Asia-Pacific (vs. North America)   | -0.350 (-0.516, -0.183)                                                | -0.345 (-0.511, -0.178)                                    |
| Heart rate†                                 | 0.007 (0.004, 0.010)                                                   | 0.007 (0.004, 0.010)                                       |
| log(eGFR) †                                 | -0.477 (-0.618, -0.335)                                                | -0.474 (-0.616, -0.333)                                    |
| log(NT-proBNP) †                            | 0.228 (0.188, 0.268)                                                   | 0.228 (0.188, 0.268)                                       |
| Sodium†                                     | -0.021 (-0.034, -0.008)                                                | -0.021 (-0.034, -0.008)                                    |
| QRS duration†                               | 0.003 (0.002, 0.004)                                                   | 0.003 (0.002, 0.004)                                       |
| Diabetes                                    | 0.333 (0.254, 0.412)                                                   | 0.332 (0.253, 0.411)                                       |
| Prior use of ACEi                           | -0.104 (-0.196, -0.013)                                                | -0.104 (-0.196, -0.012)                                    |
| Beta blocker use                            | -0.328 (-0.470, -0.185)                                                | -0.327 (-0.469, -0.184)                                    |
| Lipid lowering medication use               | 0.073 (-0.012, 0.157)                                                  | 0.072 (-0.012, 0.156)                                      |
| 1-5 years since HF diagnosis (vs. ≤1 year)  | 0.265 (0.168, 0.361)                                                   | 0.265 (0.168, 0.361)                                       |

| <b>Coefficient</b>                        | <b>UK &amp; Colombian analysis<br/>(coefficient, 95% LCI, 95% UCI)</b> | <b>Danish analysis (coefficient,<br/>95% LCI, 95% UCI)</b> |
|-------------------------------------------|------------------------------------------------------------------------|------------------------------------------------------------|
| >5 years since HF diagnosis (vs. ≤1 year) | 0.402 (0.300, 0.503)                                                   | 0.401 (0.299, 0.503)                                       |
| Ischaemic aetiology                       | 0.085 (-0.002, 0.172)                                                  | 0.085 (-0.001, 0.172)                                      |
| Prior stroke                              | 0.147 (0.020, 0.275)                                                   | 0.148 (0.021, 0.275)                                       |
| Prior atrial fibrillation/ flutter        | 0.095 (0.013, 0.176)                                                   | 0.093 (0.012, 0.175)                                       |
| Prior cancer                              | 0.164 (-0.008, 0.336)                                                  | 0.160 (-0.012, 0.331)                                      |
| Current smoker                            | 0.209 (0.103, 0.314)                                                   | 0.209 (0.103, 0.314)                                       |
| Previously hospitalised for HF            | 0.334 (0.254, 0.413)                                                   | 0.334 (0.255, 0.413)                                       |
| EQ-5D <sup>†</sup>                        | -0.487 (-0.662, -0.311)                                                | -0.645 (-0.867, -0.422)                                    |
| Constant                                  | -2.844 (-3.772, -1.917)                                                | -2.840 (-3.767, -1.913)                                    |

Abbreviations: NYHA, New York Heart Association; LVEF, Left ventricle ejection fraction; eGFR, estimated glomerular filtration rate; NT-proBNP, N-terminal pro b-type natriuretic peptide; HF, Heart failure.

<sup>†</sup>Variable has been centred on the mean

**Table 17: Results of the mixed effects model for utility**

| <b>Coefficient</b>   | <b>UK &amp; Colombian analysis (coefficient,<br/>95% LCI, 95% UCI)</b> | <b>Danish analysis (coefficient,<br/>95% LCI, 95% UCI)</b> |
|----------------------|------------------------------------------------------------------------|------------------------------------------------------------|
| Sacubitril valsartan | 0.011 (0.004, 0.017)                                                   | 0.009 (0.004, 0.014)                                       |

| <b>Coefficient</b>                          | <b>UK &amp; Colombian analysis (coefficient, 95% LCI, 95% UCI)</b> | <b>Danish analysis (coefficient, 95% LCI, 95% UCI)</b> |
|---------------------------------------------|--------------------------------------------------------------------|--------------------------------------------------------|
| Age†                                        | -0.001 (-0.001, 0.000)                                             | -0.001 (-0.001, 0.000)                                 |
| Female                                      | -0.031 (-0.039, -0.023)                                            | -0.025 (-0.031, -0.018)                                |
| Region - Latin America (vs. North America)  | 0.041 (0.027, 0.055)                                               | 0.035 (0.023, 0.046)                                   |
| Region - Western Europe (vs. North America) | 0.013 (-0.001, 0.026)                                              | 0.009 (-0.001, 0.020)                                  |
| Region - Central Europe (vs. North America) | 0.000 (-0.014, 0.013)                                              | -0.001 (-0.012, 0.009)                                 |
| Region - Asia-Pacific (vs. North America)   | 0.041 (0.026, 0.056)                                               | 0.036 (0.023, 0.048)                                   |
| NYHA class II (vs. I)                       | -0.009 (-0.024, 0.006)                                             | -0.008 (-0.021, 0.004)                                 |
| NYHA class III (vs. I)                      | -0.051 (-0.067, -0.034)                                            | -0.041 (-0.055, -0.028)                                |
| NYHA class IV (vs. I)                       | -0.092 (-0.132, -0.051)                                            | -0.058 (-0.090, -0.025)                                |
| Heart rate†                                 | 0.000 (-0.001, 0.000)                                              | 0.000 (0.000, 0.000)                                   |
| log(NT-proBNP) †                            | -0.009 (-0.013, -0.006)                                            | -0.007 (-0.010, -0.004)                                |
| Sodium†                                     | 0.001 (0.000, 0.002)                                               | 0.001 (0.000, 0.002)                                   |
| BMI                                         | -0.002 (-0.003, -0.001)                                            | -0.001 (-0.002, -0.001)                                |
| Diabetes                                    | -0.014 (-0.021, -0.007)                                            | -0.011 (-0.016, -0.005)                                |
| 1-5 years since HF diagnosis (vs. ≤1 year)  | -0.017 (-0.024, -0.009)                                            | -0.015 (-0.021, -0.008)                                |

| <b>Coefficient</b>                        | <b>UK &amp; Colombian analysis (coefficient, 95% LCI, 95% UCI)</b> | <b>Danish analysis (coefficient, 95% LCI, 95% UCI)</b> |
|-------------------------------------------|--------------------------------------------------------------------|--------------------------------------------------------|
| >5 years since HF diagnosis (vs. ≤1 year) | -0.023 (-0.031, -0.014)                                            | -0.019 (-0.026, -0.012)                                |
| Ischaemic aetiology                       | -0.007 (-0.014, -0.001)                                            | -0.005 (-0.011, 0.000)                                 |
| Prior stroke                              | -0.012 (-0.023, -0.001)                                            | -0.008 (-0.017, 0.001)                                 |
| Current smoker                            | -0.013 (-0.022, -0.004)                                            | -0.011 (-0.019, -0.004)                                |
| EQ-5D <sup>†</sup>                        | 0.488 (0.473, 0.504)                                               | 0.501 (0.486, 0.517)                                   |
| Hospitalised within previous 30 days      | -0.105 (-0.116, -0.094)                                            | -0.081 (-0.090, -0.072)                                |
| Hospitalised 30-90 days previously        | -0.054 (-0.062, -0.045)                                            | -0.044 (-0.051, -0.038)                                |
| Adverse event - cough                     | -0.028 (-0.041, -0.015)                                            | -0.025 (-0.035, -0.015)                                |
| Adverse event - hypotension               | -0.029 (-0.042, -0.017)                                            | -0.025 (-0.035, -0.015)                                |
| Time (years)                              | -0.008 (-0.010, -0.006)                                            | -0.006 (-0.007, -0.004)                                |
| Constant                                  | 0.822 (0.802, 0.843)                                               | 0.838 (0.822, 0.855)                                   |

Abbreviations: NYHA, New York Heart Association; LVEF, Left ventricle ejection fraction; eGFR, estimated glomerular filtration rate; NT-proBNP, N-terminal pro b-type natriuretic peptide; HF, Heart failure.

<sup>†</sup>Variable has been centred on the mean

### 3. Cost-effectiveness results using all-cause mortality

**Table 18: All-cause mortality cost-effectiveness results in the UK setting estimated over lifetime**

| Component                | ACEI           | Sacubitril/valsartan | Incremental    |
|--------------------------|----------------|----------------------|----------------|
| Primary therapy costs    | £153           | £7,838               | £7,685         |
| Background therapy costs | £544           | £587                 | £43            |
| Hospitalisation costs    | £7,440         | £6,819               | -£621          |
| HF management costs      | £5,058         | £5,458               | £400           |
| Adverse events           | £92            | £98                  | £6             |
| Titration                | £0             | £262                 | £262           |
| <b>Total costs</b>       | <b>£13,287</b> | <b>£21,062</b>       | <b>£7,776</b>  |
| <b>QALYs</b>             | <b>4.58</b>    | <b>5.00</b>          | <b>0.42</b>    |
| <b>ICER</b>              |                |                      | <b>£18,507</b> |

Abbreviations: ACEI, angiotensin-converting-enzyme inhibitor; AE, adverse event; ICER, incremental cost-effectiveness

ratio; HF, heart failure; QALY, quality-adjusted life-years.



**Table 19: All-cause mortality cost-effectiveness results in the Danish setting estimated over lifetime**

| Component          | ACEi               | Sacubitril/valsartan | Incremental        |
|--------------------|--------------------|----------------------|--------------------|
| Primary therapy    | kr. 1,228          | kr. 85,733           | kr. 84,505         |
| Background therapy | kr. 5,492          | kr. 5,942            | kr. 450            |
| Hospitalisation    | kr. 127,564        | kr. 117,284          | -kr. 10,280        |
| HF management      | kr. 5,373          | kr. 5,813            | kr. 440            |
| Adverse events     | kr. 349            | kr. 375              | kr. 26             |
| Titration          | kr. 0              | kr. 1,534            | kr. 1,534          |
| <b>Total costs</b> | <b>kr. 140,006</b> | <b>kr. 216,681</b>   | <b>kr. 76,675</b>  |
| <b>QALYs</b>       | <b>4.61</b>        | <b>5.04</b>          | <b>0.43</b>        |
| <b>ICER</b>        |                    |                      | <b>kr. 179,939</b> |

Abbreviations: ACEi, angiotensin-converting-enzyme inhibitor; AE, adverse event; ICER, incremental cost-effectiveness ratio; HF, heart failure; QALY, quality-adjusted life-years.

**Table 20: All-cause mortality cost-effectiveness results in the Colombian setting estimated over lifetime**

| Component          | ACEi                   | Sacubitril/valsartan   | Incremental            |
|--------------------|------------------------|------------------------|------------------------|
| Primary therapy    | COP\$3,381,980         | COP\$19,723,125        | COP\$16,341,146        |
| Background therapy | COP\$3,914,218         | COP\$4,206,007         | COP\$291,789           |
| Hospitalisation    | COP\$16,681,836        | COP\$15,228,645        | -COP\$1,453,192        |
| HF management      | COP\$3,587,628         | COP\$3,855,070         | COP\$267,443           |
| Adverse events     | COP\$92,996            | COP\$93,960            | COP\$964               |
| Titration          | COP\$0                 | COP\$51,600            | COP\$51,600            |
| <b>Total costs</b> | <b>COP\$27,658,658</b> | <b>COP\$43,158,407</b> | <b>COP\$15,499,749</b> |
| <b>QALYs</b>       | <b>4.31</b>            | <b>4.68</b>            | <b>0.37</b>            |
| <b>ICER</b>        |                        |                        | <b>COP\$41,501,493</b> |

Abbreviations: ACEi, angiotensin-converting-enzyme inhibitor; AE, adverse event; ICER, incremental cost-effectiveness ratio; HF, heart failure; QALY, quality-adjusted life-years.

## 4. Parameter selection and transformations

Covariates for consideration in the model of all-cause mortality were based on pre-specified subgroups in PARADIGM-HF, those reported by a previous economic evaluation in HF and clinical expert opinion.

When performing survival analysis, non-linearities in covariates were assessed based on Martingale residuals (Figure 2) and variables were transformed where required. Final covariates for inclusion in the risk equations were selected using a backwards stepwise selection, confirmed using forwards stepwise selection and the resulting model reviewed by clinical experts.

Region was pre-specified within the statistical analysis plan (SAP)<sup>21</sup> for analysis of the primary endpoint for PARADIGM-HF and was therefore included in all models. No other variables were identified *a priori* as being of special interest. The primary statistical analysis of PARADIGM-HF did not identify any treatment effect modifiers, and therefore interactions between such variables and the sacubitril/valsartan treatment effect were not considered. The basic covariate identification procedure performed was:

- An initial set of covariates were identified using backwards stepwise elimination (using a p-value of <0.1).
- This was validated using forwards stepwise selection (using a p-value of <0.1).
- The interim statistical model was reviewed by clinical experts at sacubitril/valsartan UK and French advisory boards
  - In addition to suggesting alternative parameters for inclusion, clinical experts recommended that potassium be removed from the predictive model due to unexpected directional effects

For hospitalisation, a negative binomial model was preferred over other possible models (such as a Poisson model), as other models displayed evidence of over dispersion, where the conditional variance of the variable was greater than the conditional mean.

Figure 2: Martingale residuals and LOESS models (dashed line) for CV mortality

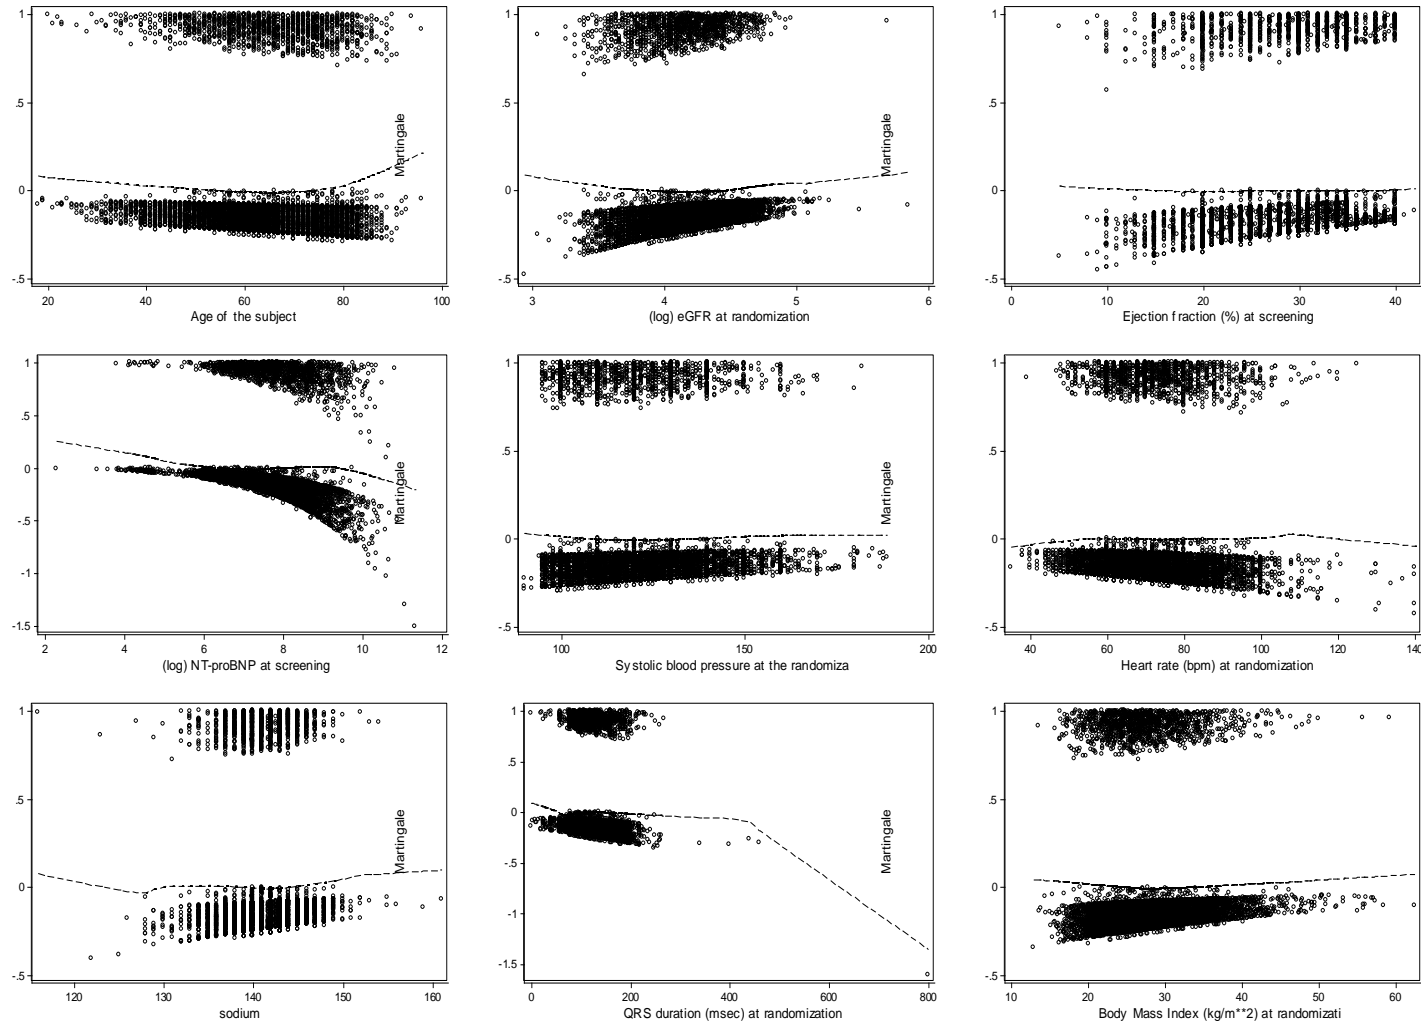

## 5. Quintile analysis

A Cox regression model predicting the risk of experiencing the primary outcome (a composite of CV mortality and HF hospitalisation) was developed using the ACEi patient population and then used to predict the risk for all patients. Patients were then ranked on the basis of the 'risk score' derived from the regression model, and divided into quintiles. Table 21, Table 22 and Table 23 present the results of the model stratified by risk quintile for the UK, Danish and Colombian settings respectively. Patients in the first quintile have the lowest risk and patients in the fifth quintile have the highest risk. In the UK setting, sacubitril/valsartan is associated with a positive net benefit at a willingness-to-pay threshold of £20,000 in all but the lowest risk quintile. In the Danish and Colombian settings sacubitril/valsartan is associated with a positive net benefit in all risk quintiles, using willingness-to-pay thresholds of kr. 250,000 and COP\$ 52.4 million respectively. The results of this analysis suggest that the cost-effectiveness of sacubitril/valsartan increases with disease severity, with severity defined here as the multivariate risk of experiencing the primary endpoint of PARADIGM-HF.

**Table 21: ICER and NMB by risk quintile in the UK setting**

| Quintile | Incremental cost | Incremental QALYs | ICER    | NMB    |
|----------|------------------|-------------------|---------|--------|
| 1        | £11,844          | 0.55              | £22,610 | -£785  |
| 2        | £10,097          | 0.56              | £18,864 | £1,091 |
| 3        | £8,971           | 0.55              | £17,063 | £1,984 |
| 4        | £7,723           | 0.51              | £15,845 | £2,467 |
| 5        | £5,895           | 0.43              | £14,458 | £2,691 |

Abbreviations: ICER, Incremental cost-effectiveness ratio; NMB, Net monetary benefit; QALYs, Quality-adjusted life-years.

**Table 22: ICER and NMB by risk quintile in the Danish setting**

| Quintile | Incremental cost | Incremental QALYs | ICER        | NMB        |
|----------|------------------|-------------------|-------------|------------|
| 1        | kr. 107,120      | 0.46              | kr. 237,069 | kr. 8,453  |
| 2        | kr. 90,864       | 0.48              | kr. 190,370 | kr. 30,274 |
| 3        | kr. 81,156       | 0.49              | kr. 168,265 | kr. 40,769 |
| 4        | kr. 69,692       | 0.46              | kr. 152,275 | kr. 46,186 |
| 5        | kr. 56,787       | 0.43              | kr. 134,924 | kr. 50,502 |

Abbreviations: ICER, Incremental cost-effectiveness ratio; NMB, Net monetary benefit; QALYs, Quality-adjusted life-years.

**Table 23: ICER and NMB by risk quintile in the Colombian setting**

| <b>Quintile</b> | <b>Incremental cost</b> | <b>Incremental QALYs</b> | <b>ICER</b>       | <b>NMB</b>     |
|-----------------|-------------------------|--------------------------|-------------------|----------------|
| 1               | COP\$21.9 million       | 0.43                     | COP\$53.7 million | COP\$1,275,857 |
| 2               | COP\$18.9 million       | 0.45                     | COP\$44.1 million | COP\$5,246,486 |
| 3               | COP\$16.9 million       | 0.45                     | COP\$39.3 million | COP\$7,269,362 |
| 4               | COP\$14.6 million       | 0.42                     | COP\$35.9 million | COP\$8,378,003 |
| 5               | COP\$11.3 million       | 0.37                     | COP\$31.7 million | COP\$8,883,291 |

Abbreviations: ICER, Incremental cost-effectiveness ratio; NMB, Net monetary benefit; QALYs, Quality-adjusted life-years.

## 6. Scenario analyses

### 6.1. Sensitivity analyses

A Cox regression model predicting the risk of experiencing the primary outcome was developed using the enalapril treated patients and then used to predict the risk of experiencing the primary outcome for all patients. Patients were ranked on the basis of the 'risk score' derived from the regression model, and divided into quintiles, with the lowest risk patients in the first quintile and high risk patients in quintile 5. The model was then run using the baseline characteristics for each patient in PARADIGM-HF and the cost-effectiveness was assessed in each quintile.

Parameter uncertainty was tested using deterministic sensitivity analysis; all model parameters were independently varied over plausible ranges and the ICER was recorded at the upper and lower value for each parameter. A number of scenarios were considered to explore the impact of structural uncertainties and assumptions in the model (see supplementary material for details).

Joint parameter uncertainty was explored through probabilistic sensitivity analysis (PSA), where all parameters were assigned distributions and simultaneously varied across 1,000 Monte Carlo simulations. A cost-effectiveness acceptability curve was estimated, presenting the probability that sacubitril/valsartan is cost-effective at a range of willingness-to-pay (WTP) thresholds.<sup>33</sup>

### 6.2. UK setting

In total, 25 scenario analyses were performed for the UK setting and the results are presented in Table 24.

**Table 24: Results of scenario analyses in the UK setting**

| Scenario | Sacubitril/valsartan | ACEi | ICER |
|----------|----------------------|------|------|
|----------|----------------------|------|------|



|                                                                     | Costs   | QALYs | Costs   | QALYs |         |
|---------------------------------------------------------------------|---------|-------|---------|-------|---------|
| Discount rate (costs = 6, outcomes = 1.5)                           | £20,786 | 6.29  | £13,111 | 5.66  | £12,170 |
| Use weibull model                                                   | £26,973 | 6.28  | £16,869 | 5.71  | £17,716 |
| Use exponential model                                               | £27,953 | 6.49  | £17,529 | 5.92  | £18,129 |
| Use all-cause mortality model                                       | £21,062 | 5.00  | £13,287 | 4.58  | £18,507 |
| HRQL time trend halved                                              | £23,720 | 5.76  | £14,814 | 5.22  | £16,328 |
| HRQL time trend doubled                                             | £23,720 | 5.23  | £14,814 | 4.76  | £19,013 |
| No decrease in HRQL over time                                       | £23,720 | 5.94  | £14,814 | 5.37  | £15,597 |
| HRQL constant after 5 years                                         | £23,720 | 5.73  | £14,814 | 5.19  | £16,227 |
| HRQL constant after 10 years                                        | £23,720 | 5.64  | £14,814 | 5.11  | £16,708 |
| No 'Sacubitril valsartan effect' on HRQL                            | £23,720 | 5.51  | £14,814 | 5.06  | £20,161 |
| Sacubitril valsartan effect applied to HF hosp only                 | £24,572 | 5.58  | £14,814 | 5.06  | £18,967 |
| Sacubitril valsartan effect applied to CV hosp only                 | £24,189 | 5.58  | £14,814 | 5.06  | £18,139 |
| Utility decrements for hosp set to zero                             | £23,720 | 5.63  | £14,814 | 5.12  | £17,257 |
| All Sacubitril valsartan treatment effects cease at year 5          | £23,302 | 5.33  | £14,814 | 5.06  | £32,114 |
| All Sacubitril valsartan treatment effects cease at year 10         | £23,514 | 5.47  | £14,814 | 5.06  | £21,205 |
| Discontinuation included                                            | £20,917 | 5.42  | £14,822 | 5.06  | £17,215 |
| Disc included; no disc after year 3                                 | £22,235 | 5.50  | £14,818 | 5.06  | £17,117 |
| Disc included, no loss of efficacy                                  | £20,996 | 5.58  | £14,822 | 5.06  | £11,880 |
| Hospitalisation costs doubled                                       | £31,417 | 5.58  | £23,110 | 5.06  | £15,983 |
| Hospitalisation costs halved                                        | £19,871 | 5.58  | £10,666 | 5.06  | £17,710 |
| Hospitalisation proportions derived using Western Europe population | £24,513 | 5.58  | £15,669 | 5.06  | £17,016 |
| All AE rates set to zero                                            | £23,610 | 5.59  | £14,712 | 5.07  | £17,100 |
| Sacubitril valsartan/ ACEi costs using target doses                 | £23,720 | 5.58  | £14,824 | 5.06  | £17,115 |
| ACEi costed using ramipril                                          | £23,720 | 5.58  | £14,863 | 5.06  | £17,040 |

| Scenario           | Sacubitril/valsartan |       | ACEi    |       | ICER    |
|--------------------|----------------------|-------|---------|-------|---------|
|                    | Costs                | QALYs | Costs   | QALYs |         |
| No titration costs | £23,458              | 5.58  | £14,814 | 5.06  | £16,631 |

Results are sensitive to discounting, and assumptions around the effect of treatment continuation. The assumption that the treatment effects for sacubitril/valsartan cease at year 5 is associated with an increase of 77% in the ICER, and was the only scenario to generate an ICER exceeding £30,000; however, we note that this represents a highly conservative scenario. Assuming no direct benefit of sacubitril/valsartan on HRQL led to an increase of 20% in the ICER, however other assumptions surrounding the rate of change in EQ-5D over time were less influential; assuming an extreme scenario in which EQ-5D declines at twice the rate of the base-case provided an increase in the ICER of 9%. The inclusion of discontinuation suggested the model was relatively linear to this, with no notable change in the ICER. Only in the extremely optimistic scenario in which discontinuation was associated with a reduction in costs but not efficacy of sacubitril/valsartan was the ICER reduced by 29%.

### 6.3. Danish setting

In addition to the 39 *a priori* defined subgroups in PARADIGM-HF, the cost-effectiveness of sacubitril/valsartan was estimated in the Danish setting for the group of patients that did not have elevated BNP/NT-proBNP at randomization. The result of this subgroup analysis is presented in Table 25 along with the scenario analyses.

**Table 25: Results of scenario analyses in the Danish setting**

| Scenario                                      | Sacubitril/valsartan |       | ACEi        |       | ICER        |
|-----------------------------------------------|----------------------|-------|-------------|-------|-------------|
|                                               | Costs                | QALYs | Costs       | QALYs |             |
| Discount rate (costs = 0%, outcomes = 0%)     | kr. 267,769          | 6.29  | kr. 169,029 | 5.67  | kr. 159,132 |
| Discount rate (costs = 5%, outcomes = 5%)     | kr. 205,091          | 4.76  | kr. 132,951 | 4.36  | kr. 183,880 |
| Include SMR = 2                               | kr. 199,201          | 4.68  | kr. 128,561 | 4.30  | kr. 185,649 |
| Include SMR = 3                               | kr. 181,141          | 4.28  | kr. 117,212 | 3.95  | kr. 194,019 |
| Use all-cause mortality model                 | kr. 216,681          | 5.04  | kr. 140,006 | 4.61  | kr. 179,939 |
| HRQL time trend halved                        | kr. 226,330          | 5.38  | kr. 145,346 | 4.90  | kr. 168,636 |
| HRQL time trend doubled                       | kr. 226,330          | 5.06  | kr. 145,346 | 4.62  | kr. 185,802 |
| No decrease in HRQL over time                 | kr. 226,330          | 5.49  | kr. 145,346 | 4.99  | kr. 163,598 |
| HRQL constant after 5 years                   | kr. 226,330          | 5.36  | kr. 145,346 | 4.88  | kr. 168,158 |
| HRQL constant after 10 years                  | kr. 226,330          | 5.30  | kr. 145,346 | 4.83  | kr. 171,400 |
| No 'LCZ696 effect' on HRQL                    | kr. 226,330          | 5.21  | kr. 145,346 | 4.81  | kr. 200,064 |
| LCZ696 effect applied to HF hosp only         | kr. 239,879          | 5.27  | kr. 145,346 | 4.81  | kr. 204,251 |
| LCZ696 effect applied to CV hosp only         | kr. 233,806          | 5.27  | kr. 145,346 | 4.81  | kr. 190,647 |
| Utility decrements for hosp set to zero       | kr. 226,330          | 5.30  | kr. 145,346 | 4.83  | kr. 174,552 |
| All LCZ696 treatment effects cease at year 5  | kr. 226,375          | 5.06  | kr. 145,346 | 4.81  | kr. 325,647 |
| All LCZ696 treatment effects cease at year 10 | kr. 226,010          | 5.18  | kr. 145,346 | 4.81  | kr. 213,986 |
| Discontinuation included                      | kr. 201,134          | 5.13  | kr. 145,546 | 4.81  | kr. 174,440 |
| Disc included; no disc after year 3           | kr. 212,505          | 5.19  | kr. 145,460 | 4.81  | kr. 173,694 |
| Disc included, no loss of efficacy            | kr. 198,892          | 5.27  | kr. 145,546 | 4.81  | kr. 114,614 |
| Hospitalisation costs doubled                 | kr. 348,597          | 5.27  | kr. 277,714 | 4.81  | kr. 152,291 |
| Hospitalisation costs halved                  | kr. 165,197          | 5.27  | kr. 79,162  | 4.81  | kr. 184,846 |
| All AE rates set to zero                      | kr. 225,937          | 5.28  | kr. 144,982 | 4.81  | kr. 173,808 |
| No weighting of PARADIGM-HF                   | kr. 242,916          | 5.77  | kr. 153,393 | 5.25  | kr. 169,580 |

| Scenario                                                                        | Sacubitril/valsartan |       | ACEi        |       | ICER        |
|---------------------------------------------------------------------------------|----------------------|-------|-------------|-------|-------------|
|                                                                                 | Costs                | QALYs | Costs       | QALYs |             |
| Full compliance, patients receive 400mg of LCZ per day                          | kr. 232,318          | 5.27  | kr. 145,346 | 4.81  | kr. 186,860 |
| Subgroup analysis for patients with non-elevated BNP/NT-proBNP at randomization | kr. 261,365          | 6.39  | kr. 165,170 | 5.95  | kr. 214,604 |

## 6.4. Colombian setting

**Table 26: Results of scenario analyses in the Colombian setting**

| Scenario                                                   | Sacubitril/valsartan |       | ACEi            |       | ICER            |
|------------------------------------------------------------|----------------------|-------|-----------------|-------|-----------------|
|                                                            | Costs                | QALYs | Costs           | QALYs |                 |
| Discount rate (costs = 6, outcomes = 1.5)                  | COP\$43,779,744      | 6.01  | COP\$27,982,617 | 5.43  | COP\$27,138,595 |
| Include SMR = 2                                            | COP\$40,933,310      | 4.43  | COP\$26,247,480 | 4.08  | COP\$42,114,355 |
| Include SMR = 3                                            | COP\$37,211,867      | 4.05  | COP\$23,979,188 | 3.75  | COP\$44,224,000 |
| Use all-cause mortality model                              | COP\$43,158,407      | 4.68  | COP\$27,658,658 | 4.31  | COP\$41,501,493 |
| HRQL time trend halved                                     | COP\$46,008,231      | 5.09  | COP\$29,284,724 | 4.65  | COP\$37,810,530 |
| HRQL time trend doubled                                    | COP\$46,008,231      | 4.66  | COP\$29,284,724 | 4.28  | COP\$43,460,192 |
| No decrease in HRQL over time                              | COP\$46,008,231      | 5.23  | COP\$29,284,724 | 4.77  | COP\$36,247,798 |
| HRQL constant after 5 years                                | COP\$46,008,231      | 5.06  | COP\$29,284,724 | 4.62  | COP\$37,677,247 |
| HRQL constant after 10 years                               | COP\$46,008,231      | 4.98  | COP\$29,284,724 | 4.55  | COP\$38,709,238 |
| No 'Sacubitril/valsartan effect' on HRQL                   | COP\$46,008,231      | 4.88  | COP\$29,284,724 | 4.52  | COP\$47,228,642 |
| Sacubitril/valsartan effect applied to HF hosp only        | COP\$47,810,228      | 4.94  | COP\$29,284,724 | 4.52  | COP\$44,110,472 |
| Sacubitril/valsartan effect applied to CV hosp only        | COP\$47,001,164      | 4.95  | COP\$29,284,724 | 4.52  | COP\$42,042,164 |
| Utility decrements for hosp set to zero                    | COP\$46,008,231      | 4.98  | COP\$29,284,724 | 4.55  | COP\$39,704,928 |
| All Sacubitril/valsartan treatment effects cease at year 5 | COP\$45,485,841      | 4.76  | COP\$29,284,724 | 4.52  | COP\$69,832,595 |

| Scenario                                                    | Sacubitril/valsartan |       | ACEi            |       | ICER            |
|-------------------------------------------------------------|----------------------|-------|-----------------|-------|-----------------|
|                                                             | Costs                | QALYs | Costs           | QALYs |                 |
| All Sacubitril/valsartan treatment effects cease at year 10 | COP\$45,748,604      | 4.87  | COP\$29,284,724 | 4.52  | COP\$47,351,165 |
| Discontinuation included                                    | COP\$40,965,087      | 4.82  | COP\$31,381,334 | 4.52  | COP\$32,353,101 |
| Disc included; no disc after year 3                         | COP\$43,221,701      | 4.88  | COP\$30,485,413 | 4.52  | COP\$35,963,470 |
| Disc included, no loss of efficacy                          | COP\$40,966,011      | 4.95  | COP\$31,381,334 | 4.52  | COP\$22,651,519 |
| Hospitalisation costs doubled                               | COP\$62,281,600      | 4.95  | COP\$46,964,424 | 4.52  | COP\$36,199,163 |
| Hospitalisation costs halved                                | COP\$37,871,546      | 4.95  | COP\$20,444,874 | 4.52  | COP\$41,184,549 |
| All AE rates set to zero                                    | COP\$45,908,187      | 4.95  | COP\$29,186,406 | 4.53  | COP\$39,483,848 |
| Sacubitril/valsartan/ ACEi costs using target doses         | COP\$46,008,231      | 4.95  | COP\$25,709,194 | 4.52  | COP\$47,972,823 |
| Re-weighting of PARADIGM-HF                                 | COP\$40,315,555      | 4.19  | COP\$25,975,330 | 3.86  | COP\$43,374,255 |
| Titration costs set to zero                                 | COP\$45,956,631      | 4.95  | COP\$29,284,724 | 4.52  | COP\$39,400,807 |
| Discount rate (costs = 6, outcomes = 1.5)                   | \$ 38,290,190        | 5.93  | \$ 22,479,350   | 5.26  | \$ 23,609,917   |
| Include SMR = 2                                             | \$ 36,696,166        | 4.59  | \$ 21,664,294   | 4.17  | \$ 35,710,131   |
| Include SMR = 3                                             | \$ 33,884,210        | 4.25  | \$ 20,154,861   | 3.89  | \$ 37,901,378   |
| Use all-cause mortality model                               | \$ 35,397,546        | 4.45  | \$ 21,012,812   | 4.06  | \$ 37,118,201   |
| HRQL time trend halved                                      | \$ 40,093,744        | 5.12  | \$ 23,449,678   | 4.60  | \$ 32,097,936   |
| HRQL time trend doubled                                     | \$ 40,093,744        | 4.75  | \$ 23,449,678   | 4.29  | \$ 36,414,209   |

| Scenario                                                            | Sacubitril/valsartan |       | ACEi          |       | ICER          |
|---------------------------------------------------------------------|----------------------|-------|---------------|-------|---------------|
|                                                                     | Costs                | QALYs | Costs         | QALYs |               |
| No decrease in HRQL over time                                       | \$ 40,093,744        | 5.24  | \$ 23,449,678 | 4.70  | \$ 30,877,922 |
| HRQL constant after 5 years                                         | \$ 40,093,744        | 5.08  | \$ 23,449,678 | 4.56  | \$ 32,084,822 |
| HRQL constant after 10 years                                        | \$ 40,093,744        | 5.02  | \$ 23,449,678 | 4.51  | \$ 32,930,958 |
| No 'Sacubitril/valsartan effect' on HRQL                            | \$ 40,093,744        | 4.93  | \$ 23,449,678 | 4.50  | \$ 38,537,322 |
| Sacubitril/valsartan effect applied to HF hosp only                 | \$ 41,393,961        | 4.99  | \$ 23,449,678 | 4.50  | \$ 36,193,811 |
| Sacubitril/valsartan effect applied to CV hosp only                 | \$ 40,809,803        | 5.00  | \$ 23,449,678 | 4.50  | \$ 34,943,712 |
| Utility decrements for hosp set to zero                             | \$ 40,093,744        | 5.02  | \$ 23,449,678 | 4.52  | \$ 33,494,458 |
| All Sacubitril/valsartan treatment effects cease at year 5          | \$ 39,236,958        | 4.78  | \$ 23,449,678 | 4.50  | \$ 55,839,640 |
| All Sacubitril/valsartan treatment effects cease at year 10         | \$ 39,764,559        | 4.93  | \$ 23,449,678 | 4.50  | \$ 38,269,205 |
| Discontinuation included                                            | \$ 34,927,014        | 4.84  | \$ 25,431,852 | 4.50  | \$ 27,657,067 |
| Disc included; no disc after year 3                                 | \$ 37,117,721        | 4.91  | \$ 24,636,708 | 4.50  | \$ 30,281,290 |
| Disc included, no loss of efficacy                                  | \$ 35,195,294        | 5.00  | \$ 25,431,852 | 4.50  | \$ 19,603,253 |
| Hospitalisation costs doubled                                       | \$ 40,093,744        | 5.00  | \$ 23,449,678 | 4.50  | \$ 33,418,323 |
| Hospitalisation costs halved                                        | \$ 40,093,744        | 5.00  | \$ 23,449,678 | 4.50  | \$ 33,418,323 |
| Hospitalisation proportions derived using Western Europe population | \$ 40,093,744        | 5.00  | \$ 23,449,678 | 4.50  | \$ 33,418,323 |
| All AE rates set to zero                                            | \$ 39,997,891        | 5.00  | \$ 23,356,991 | 4.50  | \$ 33,385,681 |

| Scenario                                            | Sacubitril/valsartan |       | ACEi             |       | ICER          |
|-----------------------------------------------------|----------------------|-------|------------------|-------|---------------|
|                                                     | Costs                | QALYs | Costs            | QALYs |               |
| Sacubitril/valsartan/ ACEi costs using target doses | \$ 40,093,744        | 5.00  | \$ 20,078,935    | 4.50  | \$ 40,186,176 |
| Re-weighting of PARADIGM-HF                         | \$ 29,246,578        | 4.14  | \$ 15,914,196    | 3.87  | \$ 49,874,549 |
| Titration costs set to zero                         | \$ 40,042,144.04     | 5.00  | \$ 23,449,678.05 | 4.50  | \$ 33,314,720 |

## 6.5. Subgroup analysis

**Table 27: UK setting, results of subgroup analysis**

| # | Subgroup                 | Δ Costs       | Δ QALYs      | ICER           | % change from full analysis set |
|---|--------------------------|---------------|--------------|----------------|---------------------------------|
| 1 | <b>Full analysis set</b> | <b>£8,906</b> | <b>0.520</b> | <b>£17,134</b> | <b>0%</b>                       |
| 2 | Baseline age < 65 years  | £9,996        | 0.610        | £16,399        | -4%                             |
| 3 | Baseline age ≥ 65 years  | £7,774        | 0.427        | £18,225        | 6%                              |
| 4 | Baseline age < 75 years  | £9,504        | 0.563        | £16,892        | -1%                             |
| 5 | Baseline age ≥ 75 years  | £6,287        | 0.332        | £18,926        | 10%                             |
| 6 | Region - North America   | £8,966        | 0.486        | £18,443        | 8%                              |
| 7 | Region - Latin America   | £8,560        | 0.554        | £15,456        | -10%                            |
| 8 | Region - Western €pe     | £9,159        | 0.492        | £18,634        | 9%                              |
| 9 | Region - Central €pe     | £8,864        | 0.484        | £18,299        | 7%                              |



| #  | Subgroup                    | Δ Costs | Δ QALYs | ICER    | % change from full analysis set |
|----|-----------------------------|---------|---------|---------|---------------------------------|
| 10 | Region - Asia-Pacific       | £8,945  | 0.607   | £14,743 | -14%                            |
| 11 | Baseline NYHA class I/ II   | £9,306  | 0.548   | £16,992 | -1%                             |
| 12 | Baseline NYHA III/ IV       | £7,687  | 0.435   | £17,677 | 3%                              |
| 13 | Baseline LVEF ≤ median      | £8,624  | 0.536   | £16,105 | -6%                             |
| 14 | Baseline LVEF > median      | £9,233  | 0.501   | £18,413 | 7%                              |
| 15 | Baseline SBP ≤ median       | £8,903  | 0.537   | £16,566 | -3%                             |
| 16 | Baseline SBP > median       | £8,910  | 0.498   | £17,874 | 4%                              |
| 17 | Baseline eGFR < 60          | £7,851  | 0.467   | £16,825 | -2%                             |
| 18 | Baseline eGFR ≥ 60          | £9,510  | 0.550   | £17,285 | 1%                              |
| 19 | Baseline NT-proBNP ≤ median | £10,250 | 0.546   | £18,790 | 10%                             |
| 20 | Baseline NT-proBNP > median | £7,457  | 0.492   | £15,156 | -12%                            |
| 21 | Diabetes at baseline        | £8,275  | 0.501   | £16,518 | -4%                             |
| 22 | No diabetes at baseline     | £9,239  | 0.530   | £17,442 | 2%                              |
| 23 | Hypertension at baseline    | £8,763  | 0.501   | £17,477 | 2%                              |
| 24 | No hypertension at baseline | £9,250  | 0.564   | £16,399 | -4%                             |
| 25 | Prior use of ACEi           | £8,967  | 0.520   | £17,250 | 1%                              |
| 26 | Prior use of ARB            | £8,684  | 0.519   | £16,741 | -2%                             |

| #  | Subgroup                                 | Δ Costs | Δ QALYs | ICER    | % change from full analysis set |
|----|------------------------------------------|---------|---------|---------|---------------------------------|
| 27 | Use of beta blocker at baseline          | £9,007  | 0.522   | £17,263 | 1%                              |
| 28 | No use of beta blocker at baseline       | £7,559  | 0.493   | £15,324 | -11%                            |
| 29 | Use of MRA at baseline                   | £8,924  | 0.533   | £16,755 | -2%                             |
| 30 | No use of MRA at baseline                | £8,883  | 0.504   | £17,637 | 3%                              |
| 31 | ≤ 1 year since diagnosis of HF           | £10,008 | 0.566   | £17,674 | 3%                              |
| 32 | 1-5 years since diagnosis of HF          | £8,677  | 0.513   | £16,923 | -1%                             |
| 33 | > 5 years since diagnosis of HF          | £8,133  | 0.484   | £16,805 | -2%                             |
| 34 | Ischaemic aetiology                      | £8,581  | 0.497   | £17,262 | 1%                              |
| 35 | Non-ischaemic aetiology                  | £9,392  | 0.554   | £16,962 | -1%                             |
| 36 | Prior atrial fibrillation at baseline    | £8,371  | 0.477   | £17,555 | 2%                              |
| 37 | No prior atrial fibrillation at baseline | £9,217  | 0.545   | £16,920 | -1%                             |
| 38 | Prior HF hospitalisation                 | £8,685  | 0.521   | £16,666 | -3%                             |
| 39 | No prior HF hospitalisation              | £9,278  | 0.517   | £17,929 | 5%                              |

Abbreviations: ACEI, angiotensin-converting enzyme inhibitor; AF, atrial fibrillation; ARB, angiotensin receptor blocker; BB, beta blocker; eGFR, estimated glomerular filtration rate; HF, heart failure; ICER, incremental cost-effectiveness ratio; LVEF, left ventricular ejection fraction; MRA, mineralocorticoid receptor antagonist; NT-proBNP, N terminal pro-brain natriuretic peptide; NYHA, New York Heart Association; QALYs, quality-adjusted life years; SBP, systolic blood pressure.

**Table 28: Danish setting, results of subgroup analysis**

| #  | Subgroup                  | Δ Costs    | Δ QALYs | ICER        | % change from full analysis set |
|----|---------------------------|------------|---------|-------------|---------------------------------|
| 1  | Full analysis set         | kr. 80,984 | 0.465   | kr. 174,295 | 0%                              |
| 2  | Baseline age < 65 years   | kr. 70,306 | 0.439   | kr. 160,204 | -8%                             |
| 3  | Baseline age ≥ 65 years   | kr. 92,074 | 0.493   | kr. 187,350 | 7%                              |
| 4  | Baseline age < 75 years   | kr. 76,760 | 0.456   | kr. 168,443 | -3%                             |
| 5  | Baseline age ≥ 75 years   | kr. 99,460 | 0.505   | kr. 197,411 | 13%                             |
| 6  | Region - North America    | kr. 80,335 | 0.455   | kr. 177,075 | 2%                              |
| 7  | Region - Latin America    | kr. 87,233 | 0.544   | kr. 160,511 | -8%                             |
| 8  | Region - Western Europe   | kr. 87,430 | 0.468   | kr. 187,495 | 8%                              |
| 9  | Region - Central Europe   | kr. 75,230 | 0.398   | kr. 189,137 | 9%                              |
| 10 | Region - Asia-Pacific     | kr. 77,271 | 0.519   | kr. 149,159 | -14%                            |
| 11 | Baseline NYHA class I/ II | kr. 85,984 | 0.498   | kr. 172,852 | -1%                             |
| 12 | Baseline NYHA III/ IV     | kr. 65,775 | 0.365   | kr. 180,277 | 3%                              |
| 13 | Baseline LVEF ≤ median    | kr. 76,863 | 0.483   | kr. 159,230 | -9%                             |
| 14 | Baseline LVEF > median    | kr. 85,774 | 0.444   | kr. 193,343 | 11%                             |
| 15 | Baseline SBP ≤ median     | kr. 78,615 | 0.472   | kr. 166,734 | -4%                             |
| 16 | Baseline SBP > median     | kr. 83,848 | 0.457   | kr. 183,738 | 5%                              |

| #  | Subgroup                           | Δ Costs    | Δ QALYs | ICER        | % change from full analysis set |
|----|------------------------------------|------------|---------|-------------|---------------------------------|
| 17 | Baseline eGFR < 60                 | kr. 77,909 | 0.460   | kr. 169,924 | -3%                             |
| 18 | Baseline eGFR ≥ 60                 | kr. 82,747 | 0.469   | kr. 176,751 | 1%                              |
| 19 | Baseline NT-proBNP ≤ median        | kr. 90,547 | 0.467   | kr. 194,375 | 12%                             |
| 20 | Baseline NT-proBNP > median        | kr. 70,680 | 0.464   | kr. 152,545 | -12%                            |
| 21 | Diabetes at baseline               | kr. 72,317 | 0.441   | kr. 164,515 | -6%                             |
| 22 | No diabetes at baseline            | kr. 85,545 | 0.479   | kr. 179,032 | 3%                              |
| 23 | Hypertension at baseline           | kr. 80,883 | 0.456   | kr. 177,702 | 2%                              |
| 24 | No hypertension at baseline        | kr. 81,229 | 0.488   | kr. 166,607 | -4%                             |
| 25 | Prior use of ACEI                  | kr. 80,069 | 0.458   | kr. 175,182 | 1%                              |
| 26 | Prior use of ARB                   | kr. 84,294 | 0.492   | kr. 171,758 | -1%                             |
| 27 | Use of beta blocker at baseline    | kr. 81,531 | 0.465   | kr. 175,781 | 1%                              |
| 28 | No use of beta blocker at baseline | kr. 73,722 | 0.476   | kr. 155,043 | -11%                            |
| 29 | Use of MRA at baseline             | kr. 76,459 | 0.455   | kr. 168,141 | -4%                             |
| 30 | No use of MRA at baseline          | kr. 86,654 | 0.478   | kr. 181,641 | 4%                              |
| 31 | ≤ 1 year since diagnosis of HF     | kr. 89,177 | 0.488   | kr. 182,899 | 5%                              |
| 32 | 1-5 years since diagnosis of HF    | kr. 78,898 | 0.459   | kr. 172,007 | -1%                             |
| 33 | > 5 years since diagnosis of HF    | kr. 75,716 | 0.451   | kr. 168,257 | -3%                             |

| #  | Subgroup                                 | Δ Costs    | Δ QALYs | ICER        | % change from full analysis set |
|----|------------------------------------------|------------|---------|-------------|---------------------------------|
| 34 | Ischaemic aetiology                      | kr. 78,172 | 0.446   | kr. 175,612 | 1%                              |
| 35 | Non-ischaemic aetiology                  | kr. 85,195 | kr. 0   | kr. 172,517 | -1%                             |
| 36 | Prior atrial fibrillation at baseline    | kr. 79,203 | 0.441   | kr. 179,834 | 3%                              |
| 37 | No prior atrial fibrillation at baseline | kr. 82,021 | 0.479   | kr. 171,325 | -2%                             |
| 38 | Prior HF hospitalisation                 | kr. 76,834 | 0.458   | kr. 168,101 | -4%                             |
| 39 | No prior HF hospitalisation              | kr. 87,988 | 0.478   | kr. 184,305 | 6%                              |

Abbreviations: ACEI, angiotensin-converting enzyme inhibitor; AF, atrial fibrillation; ARB, angiotensin receptor blocker; BB, beta blocker; eGFR, estimated glomerular filtration rate; HF, heart failure; ICER, incremental cost-effectiveness ratio; LVEF, left ventricular ejection fraction; MRA, mineralocorticoid receptor antagonist; NT-proBNP, N terminal pro-brain natriuretic peptide; NYHA, New York Heart Association; QALYs, quality-adjusted life years; SBP, systolic blood pressure.

**Table 29: Colombian setting, results of subgroup analysis**

| #  | Subgroup                  | Δ Costs         | Δ QALYs | ICER            | % change from full analysis set |
|----|---------------------------|-----------------|---------|-----------------|---------------------------------|
| 1  | <b>Full analysis set</b>  | COP\$16,723,507 | 0.42    | COP\$39,522,754 | 0                               |
| 2  | Baseline age < 65 years   | COP\$18,853,013 | 0.49    | COP\$38,099,512 | -4%                             |
| 3  | Baseline age ≥ 65 years   | COP\$14,511,818 | 0.35    | COP\$41,620,590 | 5%                              |
| 4  | Baseline age < 75 years   | COP\$17,792,183 | 0.45    | COP\$39,187,590 | -1%                             |
| 5  | Baseline age ≥ 75 years   | COP\$12,049,499 | 0.29    | COP\$41,833,409 | 6%                              |
| 6  | Region - North America    | COP\$16,575,622 | 0.39    | COP\$42,424,381 | 7%                              |
| 7  | Region - Latin America    | COP\$16,264,964 | 0.46    | COP\$35,629,374 | -10%                            |
| 8  | Region - Western €pe      | COP\$16,949,053 | 0.39    | COP\$43,083,517 | 9%                              |
| 9  | Region - Central €pe      | COP\$16,658,707 | 0.39    | COP\$42,293,957 | 7%                              |
| 10 | Region - Asia-Pacific     | COP\$17,037,325 | 0.50    | COP\$34,025,362 | -14%                            |
| 11 | Baseline NYHA class I/ II | COP\$17,431,831 | 0.44    | COP\$39,358,683 | 0%                              |
| 12 | Baseline NYHA III/ IV     | COP\$14,568,880 | 0.36    | COP\$40,131,639 | 2%                              |
| 13 | Baseline LVEF ≤ median    | COP\$16,255,758 | 0.44    | COP\$37,003,692 | -6%                             |
| 14 | Baseline LVEF > median    | COP\$17,267,246 | 0.40    | COP\$42,704,220 | 8%                              |
| 15 | Baseline SBP ≤ median     | COP\$16,742,042 | 0.44    | COP\$38,178,311 | -3%                             |

| #  | Subgroup                           | Δ Costs         | Δ QALYs | ICER            | % change from full analysis set |
|----|------------------------------------|-----------------|---------|-----------------|---------------------------------|
| 16 | Baseline SBP > median              | COP\$16,701,096 | 0.40    | COP\$41,284,903 | 4%                              |
| 17 | Baseline eGFR < 60                 | COP\$14,723,501 | 0.38    | COP\$38,328,033 | -3%                             |
| 18 | Baseline eGFR ≥ 60                 | COP\$17,870,382 | 0.45    | COP\$40,113,502 | 1%                              |
| 19 | Baseline NT-proBNP ≤ median        | COP\$19,106,429 | 0.43    | COP\$44,072,811 | 12%                             |
| 20 | Baseline NT-proBNP > median        | COP\$14,156,104 | 0.41    | COP\$34,363,742 | -13%                            |
| 21 | Diabetes at baseline               | COP\$15,504,400 | 0.41    | COP\$37,790,398 | -4%                             |
| 22 | No diabetes at baseline            | COP\$17,368,799 | 0.43    | COP\$40,397,763 | 2%                              |
| 23 | Hypertension at baseline           | COP\$16,434,013 | 0.41    | COP\$40,280,882 | 2%                              |
| 24 | No hypertension at baseline        | COP\$17,422,812 | 0.46    | COP\$37,897,548 | -4%                             |
| 25 | Prior use of ACEI                  | COP\$16,828,890 | 0.42    | COP\$39,823,524 | 1%                              |
| 26 | Prior use of ARB                   | COP\$16,339,620 | 0.42    | COP\$38,503,390 | -3%                             |
| 27 | Use of beta blocker at baseline    | COP\$16,906,269 | 0.42    | COP\$39,873,063 | 1%                              |
| 28 | No use of beta blocker at baseline | COP\$14,295,688 | 0.41    | COP\$34,729,385 | -12%                            |
| 29 | Use of MRA at baseline             | COP\$16,787,870 | 0.43    | COP\$38,637,083 | -2%                             |
| 30 | No use of MRA at baseline          | COP\$16,642,863 | 0.41    | COP\$40,701,946 | 3%                              |
| 31 | ≤ 1 year since diagnosis of HF     | COP\$18,810,155 | 0.46    | COP\$41,247,846 | 4%                              |

| #  | Subgroup                                 | Δ Costs         | Δ QALYs | ICER            | % change from full analysis set |
|----|------------------------------------------|-----------------|---------|-----------------|---------------------------------|
| 32 | 1-5 years since diagnosis of HF          | COP\$16,326,639 | 0.42    | COP\$38,922,232 | -2%                             |
| 33 | > 5 years since diagnosis of HF          | COP\$15,217,480 | 0.40    | COP\$38,405,313 | -3%                             |
| 34 | Ischaemic aetiology                      | COP\$16,087,182 | 0.40    | COP\$39,736,088 | 1%                              |
| 35 | Non-ischaemic aetiology                  | COP\$17,676,386 | 0.45    | COP\$39,235,675 | -1%                             |
| 36 | Prior atrial fibrillation at baseline    | COP\$15,661,181 | 0.39    | COP\$40,283,198 | 2%                              |
| 37 | No prior atrial fibrillation at baseline | COP\$17,342,130 | 0.44    | COP\$39,134,254 | -1%                             |
| 38 | Prior HF hospitalisation                 | COP\$16,309,618 | 0.43    | COP\$38,311,417 | -3%                             |
| 39 | No prior HF hospitalisation              | COP\$17,422,019 | 0.42    | COP\$41,600,894 | 5%                              |

Abbreviations: ACEI, angiotensin-converting enzyme inhibitor; AF, atrial fibrillation; ARB, angiotensin receptor blocker; BB, beta blocker; eGFR, estimated glomerular filtration rate; HF, heart failure; ICER, incremental cost-effectiveness ratio; LVEF, left ventricular ejection fraction; MRA, mineralocorticoid receptor antagonist; NT-proBNP, N terminal pro-brain natriuretic peptide; NYHA, New York Heart Association; QALYs, quality-adjusted life years; SBP, systolic blood pressure.



## 7. Re-weighting of the PARADIGM-HF population in the UK setting

The PARADIGM-HF population is younger, with a higher proportion of males than the general UK heart failure population. The CPRD database was accessed to assess the generalisability of the PARADIGM-HF population to the UK heart failure population<sup>22</sup>. The objective of this cohort study was to generate evidence on burden of illness of HF using a real world NHS database (CPRD). The analysis allowed the identification of subjects with HFrEF to determine the generalisability of PARADIGM-HF to UK clinical practice. Subjects in PARADIGM-HF were generally younger, more likely to be male, and more likely to be current smokers than those in CPRD (Table 30).

These differences have consequences for estimating, amongst other things, the baseline mortality rate. Because cost-effectiveness is determined by absolute differences in costs and effects, this may affect the cost-effectiveness of sacubitril/valsartan in clinical practice. In order to provide estimates of cost-effectiveness more representative of clinical practice, several scenario analyses are included in which the cohort of subjects in PARADIGM-HF is sampled or weighted in such a way as to make them more generalisable. For the UK analysis, this requires over-sampling of older and female subjects.

Raking (or sample-balancing) adjusts sampling weights across subjects such that the marginal totals of the adjusted weights on specified characteristics agree with the corresponding totals for the population. All propensity-score methods assume that balance of the observed variables leads to balance across unobserved variables i.e. there are no unobserved confounding factors that remain unbalanced.

Table 30 presents baseline characteristics prior to and following raking. The weights generated are based on age, gender, current smoking status, prior stroke and eGFR <60 mL/min. The resulting distribution of subjects after weighting closely resembles that of the CPRD HFrEF cohort. These weights are used to reweight the estimated costs and effects across the PARADIGM-HF population.

**Table 30: Comparison of PARADIGM-HF and CPRD characteristics and model characteristic after reweighting of subjects**

| Variable            | PARADIGM-HF | CPRD                   | Re-weighted PARADIGM-HF |
|---------------------|-------------|------------------------|-------------------------|
| 18–49 years         | 11          | 3 <sup>†</sup>         | 3                       |
| 50–54 years         | 9           | 3 <sup>†</sup>         | 3                       |
| 55–64 years         | 32          | 13 <sup>†</sup>        | 12                      |
| 65–69 years         | 16          | 10 <sup>†</sup>        | 10                      |
| 70–74 years         | 15          | 14 <sup>†</sup>        | 14                      |
| 75–84 years         | 17          | 35 <sup>†</sup>        | 35                      |
| 85+ years           | 1           | 22 <sup>†</sup>        | 22                      |
| Mean age (SD)       | 63.8 (11)   | 74.8 (12) <sup>†</sup> | 73.9 (11)               |
| Gender (% female)   | 22          | 41 <sup>†</sup>        | 41                      |
|                     |             |                        |                         |
| Prior stroke (%)    | 8.6         | 5.2 <sup>‡</sup>       | 5.2                     |
| eGFR <60 mL/min (%) | 36.4        | 22.6 <sup>‡</sup>      | 22.6                    |
| Current smoker (%)  | 14.4        | 8.2 <sup>‡</sup>       | 8.2                     |

Abbreviations: CPRD, Clinical Practice Research Datalink; eGFR, estimated glomerular filtration rate; HF, heart failure.

<sup>†</sup> New HF patients and LVSD within 6 months of HF diagnosis in CPRD, 2005-2013 (n=18,028)

<sup>‡</sup> Characteristics of patients with HF and LVSD, based on CPRD-HES linked data set, 2005-2013, at index date (n=10,646)

The effect of re-weighting is to assume alternative baseline characteristics of the sampled cohort. Table 31 presents the results when the re-weighted population is run through the model.

**Table 31: Cost-effectiveness results with the re-weighted population**

| Therapy              | Total costs | Total QALYs | Inc costs | Inc QALYs | ICER    |
|----------------------|-------------|-------------|-----------|-----------|---------|
| ACEi                 | £12,869     | 4.251       |           |           |         |
| Sacubitril valsartan | £20,370     | 4.644       | £7,501    | 0.393     | £19,102 |

## 8. Inclusion of the PARADIGM-HF run-in phase

PARADIGM-HF contained two run-in phases, a two-week run-in phase for enalapril during which all patients took enalapril and a four-week run-in phase for sacubitril/valsartan during which all patients took sacubitril/valsartan.<sup>23</sup> These allowed patients to reach target doses of each drug and provided investigators with short-term safety data on sacubitril/valsartan. This led to a proportion of patients discontinuing the study prior to the randomised phase and these discontinuations are not captured in the model. During the enalapril run-in, 1,102 of 10,513 (10.5%) patients discontinued the study. During the sacubitril/valsartan run-in 977 of 9,419 (10.4%) patients discontinued the study.<sup>2</sup>

In order to assess whether these discontinuations will affect the cost-effectiveness of sacubitril/valsartan a scenario analysis has been performed using the UK model. This scenario accounts for the run-in phase by assuming that 10.5% of ACEi patients and 19.7% of sacubitril/valsartan patients will discontinue during the first cycle of the model. This scenario also accounts for discontinuation during the randomised phase and assumes discontinuation requires an outpatient contact, thus incurs a cost.

**Table 32: Results of the scenario modelling the run-in phase**

| Component          | ACEi           | Sacubitril valsartan | Incremental    |
|--------------------|----------------|----------------------|----------------|
| Primary therapy    | £180           | £4,852               | £4,672         |
| Background therapy | £607           | £637                 | £30            |
| Hospitalisation    | £8,296         | £7,992               | -£303          |
| HF management      | £5,639         | £5,918               | £279           |
| Adverse events     | £102           | £107                 | £4             |
| Titration          | £0             | £262                 | £262           |
| <b>Total costs</b> | <b>£14,881</b> | <b>£19,831</b>       | <b>£4,949</b>  |
| <b>QALYs</b>       | <b>5.06</b>    | <b>5.35</b>          | <b>0.29</b>    |
| <b>ICER</b>        |                |                      | <b>£17,246</b> |

**Table 33: Results of the scenario considering randomised phase discontinuation only**

| Component          | ACEi           | Sacubitril valsartan | Incremental    |
|--------------------|----------------|----------------------|----------------|
| Primary therapy    | £173           | £7,046               | £6,873         |
| Background therapy | £607           | £651                 | £45            |
| Hospitalisation    | £8,296         | £7,834               | -£461          |
| HF management      | £5,639         | £6,054               | £415           |
| Adverse events     | £102           | £109                 | £6             |
| Titration          | £0             | £262                 | £262           |
| <b>Total costs</b> | <b>£14,830</b> | <b>£21,981</b>       | <b>£7,151</b>  |
| <b>QALYs</b>       | <b>5.06</b>    | <b>5.48</b>          | <b>0.42</b>    |
| <b>ICER</b>        |                |                      | <b>£17,082</b> |

Table 32 presents the results of this scenario and Table 33 presents the results of the scenario where only randomised phase discontinuation is considered. Modelling the run-in phase is associated with a decrease in both incremental costs and incremental QALY and results in a small increase in the ICER. These results suggest that the inclusion of a run-in phase is unlikely to affect the cost-effectiveness of sacubitril/valsartan.

## 9. Comparison of sacubitril/valsartan with ARBs in the UK setting

Presented below are the results of an analysis comparing sacubitril/valsartan to ARBs in the UK setting. The same model structure was applied as in the base case and the efficacy of ARBs was defined relative to ACEi. There were assumed to be equally effective on reducing CV mortality and to have a rate ratio of 0.90 compared to ACEi for all-cause hospitalisation. The monthly cost of ARB was assumed to be £2.39 (one 100 mg tab and one 50 mg tab of candesartan is taken daily). Adverse event rates were assumed to be equal to those for sacubitril/valsartan.

| Component          | ARB            | Sacubitril valsartan | Incremental    |
|--------------------|----------------|----------------------|----------------|
| Primary therapy    | £195           | £8,836               | £8,641         |
| Background therapy | £607           | £662                 | £55            |
| Hospitalisation    | £7,493         | £7,697               | £204           |
| HF management      | £5,639         | £6,153               | £514           |
| Adverse events     | £101           | £110                 | £9             |
| Titration costs    | £0             | £262                 | £262           |
| <b>Total costs</b> | <b>£14,034</b> | <b>£23,720</b>       | <b>£9,685</b>  |
| <b>QALYs</b>       | <b>5.07</b>    | <b>5.58</b>          | <b>0.52</b>    |
| <b>ICER</b>        |                |                      | <b>£18,298</b> |

## References

1. Joint Formulary Committee. British National Formulary. Available at:  
<http://www.bnf.org/bnf/index.htm> (last accessed: 20th February 2015).
2. McMurray JJ, Packer M, Desai AS, et al. Angiotensin-neprilysin inhibition versus enalapril in heart failure. *The New England journal of medicine* 2014;**371**(11):993-1004.
3. Department of Health. NHS reference costs 2013 to 2014. Available at:  
<https://www.gov.uk/government/publications/nhs-reference-costs-2013-to-2014> (last accessed: 06 Mar 2015). 2015.
4. DataMed Solutions LLC. Heart Failure Burden in the UK. Analysis of CPRD (Clinical Practice Research Datalink, <http://www.cprd.com/intro.asp>) data. Data on file. . 2015.
5. Curtis L. *Unit Costs of Health and Social Care 2014*. Available at: <http://www.pssru.ac.uk/project-pages/unit-costs/2014/> (last accessed: 06 Mar 15). Canterbury: Personal Social Services Research Unit, 2014.
6. PSSRU. *Unit Costs of Health and Social Care 2014*. Available at: <http://www.pssru.ac.uk/project-pages/unit-costs/2014/> (last accessed: 22 February 2015). 2014.
7. Agency DM. Lægemedelstyrelsen - consumer prices excluding VAT. Available from  
[www.medicinpriser.dk](http://www.medicinpriser.dk). Last accessed 18/05/2016. 2015.
8. Sundhedsdatastyrelsen. DRG-takster 2015. Available from  
<http://sundhedsdatastyrelsen.dk/da/afregning-og-finansiering/takster-drg/takster-2015>.  
Last accessed 13/12/2016. 2015.
9. IMF. World Economic Outlook Database. Available from:  
<https://www.imf.org/external/pubs/ft/weo/2015/01/weodata/index.aspx>. Last accessed  
14/12/2016. 2015.
10. IMS. Malaysia Pharmaceutical Audit. 2015.

11. Negara IJ. Institut Jantung Negara Estimated Pricelist. Available from:  
[http://www.globalbenefitoptions.com/upload/facility\\_attachment/DBEQ-G543-E66X.pdf](http://www.globalbenefitoptions.com/upload/facility_attachment/DBEQ-G543-E66X.pdf).  
Last accessed 19/10/2015. 2015.
12. Council MHT. Medical Cost References. Available from:  
<http://www.medicaltourism.com.my/en/assets/pdf/Medical%20Costs1-8-14Asian%20Currencies.pdf>. Last accessed 19/10/2015. 2015.
13. Clarke PM, Glasziou P, Patel A, et al. Event Rates, Hospital Utilization, and Costs Associated with Major Complications of Diabetes: A Multicountry Comparative Analysis. *PLOS Medicine* 2010;**7**(2):e1000236.
14. Goldhaber-Fiebert JD, Li H, Ratanawijitrasin S, et al. Inpatient treatment of diabetic patients in Asia: evidence from India, China, Thailand and Malaysia. *Diabetic medicine : a journal of the British Diabetic Association* 2010;**27**(1):101-8.
15. Aznida F, Azlin NM, Amrizal M, et al. The cost of treating an acute ischaemic stroke event and follow-up at a teaching hospital in Malaysia: a Casemix costing analysis. *BMC Health Services Research* 2012;**12**(1):P6.
16. Aljunid S, Namaitjiang M, Al-Abed A, et al. The Burden of Pneumonia in Malaysia, Indonesia and Philippines. *Value in Health*;**16**(7):A369.
17. Azmi S, Aljunid S, Goh A, et al. PCV34 Cost and Treatment Duration for Acute Myocardial Infarction in South East Asia. *Value in Health*;**15**(4):A117-A18.
18. Berhad. KH. Annual Report 2014. 317 p. 2014.
19. Fee Schedule-Professional Fee, Private Healthcare Facilities and Services (Private Hospitals and Other Private Healthcare Facilities) (Amendment) Order 2013. p 174. 2013.
20. Putrajaya H. Full paying Patient (Hospital Charges). Available from:  
<http://www.hpi.gov.my/portalv11/index.php/en/full-paying-patient-fpp>. Last accessed 19/10/2015. 2015.

21. Novartis. A multicenter, randomized, double-blind, parallel group, active-controlled study to evaluate the efficacy and safety of LCZ696 compared to enalapril on morbidity and mortality in patients with chronic heart failure and reduced ejection fractionRAP Module 3 – Detailed Statistical Methodology. Data on file September 30 2012.
22. DataMed Solutions LLC. Heart Failure Burden in the UK. Analysis of CPRD (Clinical Practice Research Datalink, <http://www.cprd.com/intro.asp>) data. Data on file 2015.
23. McMurray JJ, Packer M, Desai AS, et al. Dual angiotensin receptor and neprilysin inhibition as an alternative to angiotensin-converting enzyme inhibition in patients with chronic systolic heart failure: rationale for and design of the Prospective comparison of ARNI with ACEI to Determine Impact on Global Mortality and morbidity in Heart Failure trial (PARADIGM-HF). European journal of heart failure 2013;**15**(9):1062-73.
